# Supplementary material for: Potential benefits from global warming to the thermal biology and locomotor performance of an endangered Patagonian lizard
Source: PeerJ. 2019 Aug 9;7:e7437. doi: 10.7717/peerj.7437 (PMC6690334; doi:10.7717/peerj.7437)
Supplement: Supplemental Information 2 [file peerj-07-7437-s002.xlsx]

## Sheet: Operative Temperatures
Date Time, GMT-03:00	Crevice	Sun	Crevice West	Sun West	Crevice East	Sun East
2019-01-30 10:00:00	14.745	14.697	14.888	14.433	14.553	14.505
2019-01-30 10:30:00	15.891	16.296	16.225	16.296	16.153	15.748
2019-01-30 11:00:00	19.603	27.063	23.545	28.27	22.489	21.199
2019-01-30 11:30:00	14.266	19.056	12.195	12.316	23.785	36.715
2019-01-30 12:00:00	14.673	20.317	12.606	13.112	24.388	40.458
2019-01-30 12:30:00	15.223	20.936	13.112	13.978	25.234	40.114
2019-01-30 13:00:00	16.034	22.657	13.618	14.96	27.284	38.98
2019-01-30 13:30:00	16.892	25.065	14.026	29.59	25.671	35.422
2019-01-30 14:00:00	17.891	27.235	14.625	33.287	24.919	32.278
2019-01-30 14:30:00	18.129	24.75	15.557	32.33	24.75	29.941
2019-01-30 15:00:00	19.151	25.963	16.654	31.919	23.016	27.358
2019-01-30 15:30:00	19.841	27.407	17.534	34.176	22.058	24.146
2019-01-30 16:00:00	20.436	27.161	18.319	31.893	22.034	23.04
2019-01-30 16:30:00	20.936	27.751	19.056	32.021	21.987	22.633
2019-01-30 17:00:00	21.056	27.456	19.199	32.073	20.936	21.581
2019-01-30 17:30:00	21.151	26.622	19.389	29.991	20.65	20.984
2019-01-30 18:00:00	20.984	25.866	19.413	28.543	20.126	20.341
2019-01-30 18:30:00	20.77	25.404	19.389	27.308	19.508	19.627
2019-01-30 19:00:00	20.484	24.291	19.222	25.574	18.937	18.961
2019-01-30 19:30:00	20.222	25.501	19.199	25.987	18.461	18.176
2019-01-30 20:00:00	19.698	22.776	18.842	22.729	17.605	17.225
2019-01-30 20:30:00	18.723	19.222	18.319	19.199	16.987	16.249
2019-01-30 21:00:00	17.344	14.098	17.796	14.673	16.63	15.103
2019-01-30 21:30:00	16.392	12.195	17.13	13.449	15.342	13.978
2019-01-30 22:00:00	15.318	10.907	16.463	11.662	15.127	12.05
2019-01-30 22:30:00	13.882	10.59	15.843	11.102	14.984	12.219
2019-01-30 23:00:00	12.896	9.879	14.505	10.418	14.29	12.001
2019-01-30 23:30:00	11.71	9.114	13.738	9.509	13.69	11.273
2019-01-31	10.834	8.394	12.05	8.817	12.074	10.296
2019-01-31 00:30:00	10.565	7.619	12.195	8.27	12.316	9.509
2019-01-31 01:00:00	10.149	7.066	13.088	7.795	11.904	8.045
2019-01-31 01:30:00	9.312	7.293	11.419	7.67	11.856	8.717
2019-01-31 02:00:00	9.558	6.255	12.364	7.293	11.273	7.569
2019-01-31 02:30:00	9.361	5.024	12.606	6.408	11.224	6.737
2019-01-31 03:00:00	9.435	3.985	12.896	6.102	10.687	5.975
2019-01-31 03:30:00	8.767	3.433	12.582	5.437	9.977	4.973
2019-01-31 04:00:00	8.22	3.749	11.807	5.076	9.706	4.35
2019-01-31 04:30:00	8.419	3.327	12.292	5.308	9.879	4.506
2019-01-31 05:00:00	6.102	2.557	11.953	4.818	8.693	4.662
2019-01-31 05:30:00	6.408	1.913	11.71	4.662	9.04	3.985
2019-01-31 06:00:00	7.268	1.425	11.71	4.506	8.841	3.459
2019-01-31 06:30:00	4.402	0.88	11.224	4.063	8.07	2.903
2019-01-31 07:00:00	4.063	1.044	11.029	4.141	7.77	3.089
2019-01-31 07:30:00	6.408	3.089	10.59	3.932	13.954	9.509
2019-01-31 08:00:00	7.268	7.167	10.026	6.357	14.098	16.487
2019-01-31 08:30:00	8.07	8.941	10.173	7.393	14.816	23.04
2019-01-31 09:00:00	8.866	10.271	10.247	8.145	15.867	26.061
2019-01-31 09:30:00	9.682	11.856	10.418	8.767	17.486	29.966
2019-01-31 10:00:00	11.151	14.481	11.2	10.638	19.77	33.365
2019-01-31 10:30:00	12.485	16.368	12.001	12.025	21.509	35.368
2019-01-31 11:00:00	13.882	18.271	12.799	13.401	23.761	37.618
2019-01-31 11:30:00	15.151	21.032	13.425	14.242	25.137	38.504
2019-01-31 12:00:00	16.249	21.748	14.218	15.748	25.307	38.365
2019-01-31 12:30:00	17.034	22.705	14.888	16.558	25.841	38.421
2019-01-31 13:00:00	17.867	23.256	15.748	17.463	28.419	37.811
2019-01-31 13:30:00	17.938	21.772	16.225	25.89	26.475	33.339
2019-01-31 14:00:00	18.129	21.7	16.558	26.158	25.501	30.167
2019-01-31 14:30:00	19.008	22.561	17.272	28.444	24.919	28.419
2019-01-31 15:00:00	19.674	23.881	17.891	28.493	23.593	26.573
2019-01-31 15:30:00	20.293	24.871	18.747	28.816	23.064	24.243
2019-01-31 16:00:00	20.412	24.823	19.175	28.742	22.417	23.112
2019-01-31 16:30:00	20.198	23.905	19.199	27.407	21.652	22.13
2019-01-31 17:00:00	20.174	24.098	19.365	27.087	21.127	21.485
2019-01-31 17:30:00	20.412	25.234	19.484	28.097	20.817	21.032
2019-01-31 18:00:00	19.96	23.881	19.127	25.914	20.269	20.436
2019-01-31 18:30:00	19.127	22.011	18.652	23.376	19.199	19.341
2019-01-31 19:00:00	18.652	21.437	18.271	22.321	18.485	18.438
2019-01-31 19:30:00	17.796	19.793	17.748	20.126	17.486	17.272
2019-01-31 20:00:00	16.701	17.819	16.963	17.891	16.63	16.225
2019-01-31 20:30:00	15.963	16.272	16.463	16.272	15.986	15.366
2019-01-31 21:00:00	15.127	13.449	15.915	13.858	15.533	14.481
2019-01-31 21:30:00	14.218	12.727	15.342	13.016	14.936	13.834
2019-01-31 22:00:00	13.69	12.34	14.96	12.606	14.29	13.161
2019-01-31 22:30:00	12.823	11.102	15.438	11.759	14.337	12.654
2019-01-31 23:00:00	13.209	10.296	15.031	11.127	14.242	12.025
2019-01-31 23:30:00	12.461	10.516	14.457	10.956	13.401	11.492
2019-02-01	12.025	9.903	13.762	10.345	13.497	11.419
2019-02-01 00:30:00	11.613	9.657	13.738	10.124	13.353	10.712
2019-02-01 01:00:00	11.224	9.509	13.305	9.952	13.137	10.492
2019-02-01 01:30:00	11.102	9.608	13.112	9.977	13.161	10.369
2019-02-01 02:00:00	10.98	9.238	12.944	9.608	12.847	10.051
2019-02-01 02:30:00	10.736	8.668	13.209	9.262	12.34	9.139
2019-02-01 03:00:00	10.443	7.72	12.968	8.295	12.001	8.344
2019-02-01 03:30:00	9.558	7.67	12.025	8.07	11.37	8.02
2019-02-01 04:00:00	9.213	7.268	11.613	7.67	11.029	7.87
2019-02-01 04:30:00	9.213	7.569	11.71	8.07	10.98	6.965
2019-02-01 05:00:00	8.941	5.411	12.195	6.737	11.127	6.737
2019-02-01 05:30:00	8.444	4.818	12.147	6.484	10.59	6.357
2019-02-01 06:00:00	8.245	3.985	12.098	5.796	10.32	5.898
2019-02-01 06:30:00	7.72	3.591	11.832	5.616	10.271	5.282
2019-02-01 07:00:00	8.444	4.037	11.856	6	10.296	5.462
2019-02-01 07:30:00	8.866	6.661	11.759	7.142	16.272	11.613
2019-02-01 08:00:00	11.37	10.247	11.565	7.167	15.533	19.603
2019-02-01 08:30:00	11.856	12.799	11.929	8.841	16.01	25.283
2019-02-01 09:00:00	11.88	13.858	11.929	9.854	17.296	29.464
2019-02-01 09:30:00	14.697	16.63	12.147	10.907	18.794	33.261
2019-02-01 10:00:00	15.939	19.698	12.92	13.088	21.342	35.609
2019-02-01 10:30:00	16.725	22.034	13.425	14.17	22.872	38.309
2019-02-01 11:00:00	17.772	23.809	13.93	15.247	23.641	38.756
2019-02-01 11:30:00	18.224	25.793	14.553	16.32	25.939	41.795
2019-02-01 12:00:00	18.747	25.939	15.342	17.272	27.358	43.043
2019-02-01 12:30:00	22.8	33.809	15.27	17.748	27.801	44.999
2019-02-01 13:00:00	20.746	29.29	16.225	19.008	29.24	43.465
2019-02-01 13:30:00	21.461	28.941	17.034	33.391	28.742	39.971
2019-02-01 14:00:00	22.178	31.944	17.819	38.421	29.29	37.425
2019-02-01 14:30:00	23.136	29.265	19.294	39.686	27.579	33.861
2019-02-01 15:00:00	24.219	36.606	19.912	43.495	27.014	32.536
2019-02-01 15:30:00	24.871	39.375	20.436	45.311	26.965	29.439
2019-02-01 16:00:00	25.647	37.976	22.106	44.472	26.671	28.369
2019-02-01 16:30:00	26.304	38.952	22.561	45.217	26.28	27.727
2019-02-01 17:00:00	26.867	40.228	23.424	45.562	25.939	27.407
2019-02-01 17:30:00	27.259	40.4	24.002	45.908	25.695	26.916
2019-02-01 18:00:00	26.378	42.863	23.954	49.649	25.234	26.426
2019-02-01 18:30:00	26.989	39.516	24.581	42.684	24.968	26.036
2019-02-01 19:00:00	25.04	37.59	24.702	44.442	24.243	25.137
2019-02-01 19:30:00	24.363	37.618	24.871	41.795	23.617	24.339
2019-02-01 20:00:00	23.833	34.969	25.065	39.346	23.136	23.641
2019-02-01 20:30:00	23.184	31.001	25.258	34.624	22.489	22.776
2019-02-01 21:00:00	22.393	23.905	24.895	26.061	21.795	21.795
2019-02-01 21:30:00	21.652	21.939	24.581	23.785	21.032	20.65
2019-02-01 22:00:00	20.889	19.984	24.339	21.939	20.079	19.413
2019-02-01 22:30:00	20.103	19.008	24.05	20.65	19.888	19.08
2019-02-01 23:00:00	19.698	18.557	23.737	20.031	19.746	18.985
2019-02-01 23:30:00	19.936	18.295	23.352	20.174	19.413	18.628
2019-02-02	19.389	17.51	23.04	19.413	19.056	18.152
2019-02-02 00:30:00	18.39	15.843	22.417	17.891	18.152	16.63
2019-02-02 01:00:00	17.486	15.461	22.178	17.368	18.057	16.534
2019-02-02 01:30:00	17.701	16.01	21.915	17.582	18.176	16.987
2019-02-02 02:00:00	17.558	15.939	21.27	17.391	17.962	16.892
2019-02-02 02:30:00	17.177	15.533	21.032	16.987	17.558	16.606
2019-02-02 03:00:00	16.749	14.29	20.936	16.082	17.082	15.629
2019-02-02 03:30:00	15.247	12.678	20.531	14.577	15.963	13.954
2019-02-02 04:00:00	14.721	12.775	19.674	14.218	16.249	14.17
2019-02-02 04:30:00	14.792	13.112	19.294	14.409	16.129	14.314
2019-02-02 05:00:00	14.242	12.098	18.985	13.57	15.7	13.546
2019-02-02 05:30:00	13.305	11.102	18.842	12.775	15.318	12.509
2019-02-02 06:00:00	12.92	10.834	18.652	12.437	14.936	12.243
2019-02-02 06:30:00	12.171	9.952	18.366	11.904	14.361	11.467
2019-02-02 07:00:00	12.268	10.026	17.962	12.05	14.218	11.467
2019-02-02 07:30:00	13.088	11.273	17.463	12.025	17.249	14.409
2019-02-02 08:00:00	15.294	13.834	17.106	12.92	17.391	18.271
2019-02-02 08:30:00	15.915	14.984	16.415	13.425	17.938	20.246
2019-02-02 09:00:00	16.796	15.891	16.415	13.642	18.842	21.867
2019-02-02 09:30:00	17.748	17.177	16.463	14.026	19.912	23.4
2019-02-02 10:00:00	18.414	18.319	16.677	14.481	20.555	24.026
2019-02-02 10:30:00	18.961	20.031	16.796	15.031	21.819	25.016
2019-02-02 11:00:00	19.651	21.485	17.034	15.772	22.465	25.793
2019-02-02 11:30:00	20.031	23.256	17.225	16.249	23.785	26.965
2019-02-02 12:00:00	20.436	24.75	17.415	16.82	24.508	28.048
2019-02-02 12:30:00	21.056	26.867	17.772	17.653	25.477	29.565
2019-02-02 13:00:00	21.127	27.53	18.129	18.176	26.061	28.543
2019-02-02 13:30:00	21.27	27.702	18.652	34.36	24.388	26.378
2019-02-02 14:00:00	20.579	28.791	19.151	36.308	23.857	24.388
2019-02-02 14:30:00	20.412	26.012	20.055	37.37	22.8	23.424
2019-02-02 15:00:00	20.555	30.748	21.294	42.001	22.369	22.896
2019-02-02 15:30:00	20.77	33.079	21.533	43.133	22.369	21.843
2019-02-02 16:00:00	20.984	32.484	22.178	40.891	22.154	21.7
2019-02-02 16:30:00	21.294	33.469	22.753	42.624	22.13	21.795
2019-02-02 17:00:00	21.294	33.209	23.352	42.445	21.939	21.676
2019-02-02 17:30:00	21.39	33.678	23.833	42.535	21.843	21.7
2019-02-02 18:00:00	21.27	32.924	24.436	42.327	21.533	21.485
2019-02-02 18:30:00	21.342	32.33	24.726	40.028	21.413	21.437
2019-02-02 19:00:00	21.175	30.621	24.653	37.042	21.032	21.151
2019-02-02 19:30:00	20.96	29.414	24.412	34.73	20.722	20.793
2019-02-02 20:00:00	20.674	27.53	24.363	31.816	20.365	20.341
2019-02-02 20:30:00	20.246	24.388	24.412	29.04	19.77	19.627
2019-02-02 21:00:00	19.722	19.888	23.881	23.28	19.175	18.747
2019-02-02 21:30:00	19.318	18.604	23.665	21.843	18.652	17.938
2019-02-02 22:00:00	18.604	17.558	23.256	20.222	18.295	17.296
2019-02-02 22:30:00	17.843	16.511	23.04	19.056	18.033	16.463
2019-02-02 23:00:00	16.654	15.342	22.776	17.653	17.51	15.414
2019-02-02 23:30:00	16.558	14.984	22.369	17.201	17.272	15.318
2019-02-03	16.129	14.385	22.178	16.701	17.106	14.84
2019-02-03 00:30:00	16.129	14.074	21.795	16.511	16.749	14.601
2019-02-03 01:00:00	15.724	13.978	21.342	16.034	16.701	14.553
2019-02-03 01:30:00	15.867	13.93	20.793	16.01	16.272	14.529
2019-02-03 02:00:00	15.175	13.233	20.603	15.223	16.129	14.002
2019-02-03 02:30:00	15.557	13.449	19.888	15.366	15.509	14.17
2019-02-03 03:00:00	14.721	12.509	19.912	14.649	15.652	13.497
2019-02-03 03:30:00	14.457	12.001	19.627	14.074	15.318	12.92
2019-02-03 04:00:00	13.353	10.858	19.127	13.209	14.792	11.88
2019-02-03 04:30:00	12.364	9.854	18.604	12.171	14.242	10.956
2019-02-03 05:00:00	12.147	9.608	18.58	11.904	14.17	10.785
2019-02-03 05:30:00	13.305	11.904	17.534	13.257	13.93	12.413
2019-02-03 06:00:00	13.088	11.151	17.32	12.775	13.714	12.147
2019-02-03 06:30:00	13.112	10.614	16.773	12.413	13.473	11.71
2019-02-03 07:00:00	13.016	10.736	16.32	12.437	13.449	11.759
2019-02-03 07:30:00	13.666	12.001	16.272	12.727	16.796	14.768
2019-02-03 08:00:00	15.27	14.242	16.153	13.353	17.106	18.604
2019-02-03 08:30:00	17.272	16.177	16.796	13.786	18.247	21.987
2019-02-03 09:00:00	18.557	17.51	16.868	14.529	19.175	23.93
2019-02-03 09:30:00	19.222	18.604	16.987	15.199	20.531	24.823
2019-02-03 10:00:00	20.269	20.674	17.225	15.891	21.987	26.695
2019-02-03 10:30:00	21.27	22.657	17.582	16.844	22.992	28.048
2019-02-03 11:00:00	22.202	24.484	18.033	17.938	23.809	28.791
2019-02-03 11:30:00	22.681	25.525	18.533	18.866	24.291	29.065
2019-02-03 12:00:00	22.848	27.063	18.771	19.127	25.89	29.916
2019-02-03 12:30:00	23.809	28.941	19.365	20.936	25.38	30.9
2019-02-03 13:00:00	23.689	29.515	19.888	21.079	27.21	30.041
2019-02-03 13:30:00	24.267	29.615	20.46	35.288	25.89	28.468
2019-02-03 14:00:00	23.472	30.646	21.008	37.398	25.404	26.573
2019-02-03 14:30:00	23.424	28.048	22.178	41.854	25.258	26.085
2019-02-03 15:00:00	23.472	32.175	22.705	40.314	24.315	25.258
2019-02-03 15:30:00	23.472	34.045	23.593	44.104	24.146	24.267
2019-02-03 16:00:00	23.737	34.704	23.978	43.768	24.074	24.243
2019-02-03 16:30:00	23.809	34.995	24.532	43.647	23.954	24.171
2019-02-03 17:00:00	23.857	34.045	25.113	42.208	23.833	24.171
2019-02-03 17:30:00	23.761	34.916	25.21	42.564	23.641	23.954
2019-02-03 18:00:00	23.737	33.521	25.744	40.516	23.448	23.833
2019-02-03 18:30:00	23.713	33.027	25.793	39.093	23.256	23.713
2019-02-03 19:00:00	23.472	32.073	26.134	37.755	22.944	23.376
2019-02-03 19:30:00	23.256	30.571	25.841	34.995	22.609	23.04
2019-02-03 20:00:00	22.944	28.568	25.623	31.944	22.226	22.585
2019-02-03 20:30:00	22.393	25.21	25.38	28.468	21.7	21.843
2019-02-03 21:00:00	21.748	21.772	25.089	24.388	21.056	20.793
2019-02-03 21:30:00	21.032	20.341	24.823	22.705	20.46	19.817
2019-02-03 22:00:00	20.365	19.27	24.629	21.581	19.984	19.008
2019-02-03 22:30:00	20.126	18.866	24.146	21.032	19.651	18.771
2019-02-03 23:00:00	20.079	18.794	23.641	20.746	19.413	18.794
2019-02-03 23:30:00	19.555	17.653	23.689	19.841	19.103	18.033
2019-02-04	19.294	17.296	23.304	19.389	18.723	17.724
2019-02-04 00:30:00	18.985	16.701	23.016	18.889	18.485	17.272
2019-02-04 01:00:00	18.509	16.392	22.633	18.366	18.224	17.058
2019-02-04 01:30:00	18.129	15.676	22.537	17.724	18.033	16.463
2019-02-04 02:00:00	18.129	15.27	21.987	17.391	17.582	16.034
2019-02-04 02:30:00	17.938	15.366	21.39	17.225	17.272	16.082
2019-02-04 03:00:00	17.534	14.984	20.984	16.868	16.939	15.796
2019-02-04 03:30:00	17.106	14.481	20.674	16.272	16.701	15.342
2019-02-04 04:00:00	17.225	13.473	20.698	15.652	16.606	14.457
2019-02-04 04:30:00	16.796	13.209	20.269	15.438	16.344	14.218
2019-02-04 05:00:00	16.534	12.992	19.912	15.079	16.153	13.978
2019-02-04 05:30:00	16.606	12.775	19.603	14.457	16.058	13.329
2019-02-04 06:00:00	16.272	12.316	19.056	13.858	15.605	13.161
2019-02-04 06:30:00	14.601	11.151	19.318	13.401	14.936	12.219
2019-02-04 07:00:00	13.57	10.785	19.056	13.233	14.529	11.88
2019-02-04 07:30:00	13.978	11.759	18.794	13.185	17.368	14.601
2019-02-04 08:00:00	16.677	14.337	18.747	14.17	17.724	18.889
2019-02-04 08:30:00	18.652	17.415	18.675	15.247	19.151	23.16
2019-02-04 09:00:00	19.389	18.343	18.366	15.867	20.603	24.653
2019-02-04 09:30:00	20.555	19.96	18.533	16.511	21.819	26.549
2019-02-04 10:00:00	21.533	21.843	18.58	17.082	23.256	28.468
2019-02-04 10:30:00	22.034	22.705	18.842	17.843	23.448	27.85
2019-02-04 11:00:00	22.321	24.146	19.08	18.485	24.605	28.518
2019-02-04 11:30:00	22.968	26.451	19.27	19.008	26.329	30.343
2019-02-04 12:00:00	23.689	28.147	19.698	20.031	26.549	31.306
2019-02-04 12:30:00	24.098	30.293	20.174	21.079	27.949	32.175
2019-02-04 13:00:00	24.774	31.204	20.936	22.369	28.742	31.714
2019-02-04 13:30:00	24.774	30.318	21.366	37.288	27.431	29.765
2019-02-04 14:00:00	24.726	34.624	22.274	43.556	27.924	29.29
2019-02-04 14:30:00	24.605	29.29	23.256	44.38	26.867	27.974
2019-02-04 15:00:00	24.484	36.769	24.074	48.471	25.987	27.21
2019-02-04 15:30:00	24.895	40.114	24.774	49.006	25.987	26.353
2019-02-04 16:00:00	24.895	39.177	25.38	49.615	25.744	25.89
2019-02-04 16:30:00	25.137	40.286	25.768	49.208	25.525	25.817
2019-02-04 17:00:00	25.113	40.833	26.916	50.856	25.453	25.695
2019-02-04 17:30:00	25.623	41.678	27.112	48.637	25.647	26.061
2019-02-04 18:00:00	26.671	42.416	26.646	45.03	25.914	26.451
2019-02-04 18:30:00	27.875	39.121	26.72	41.56	26.451	27.063
2019-02-04 19:00:00	28.543	35.208	26.916	37.151	25.89	26.598
2019-02-04 19:30:00	28.27	35.85	27.186	38.17	25.939	26.769
2019-02-04 20:00:00	26.769	34.045	27.875	37.728	25.355	26.158
2019-02-04 20:30:00	25.671	28.394	27.554	31.306	24.195	24.726
2019-02-04 21:00:00	25.016	25.355	27.308	27.998	23.472	23.665
2019-02-04 21:30:00	24.291	24.291	26.916	26.524	23.088	23.184
2019-02-04 22:00:00	23.905	23.448	26.671	25.501	22.681	22.609
2019-02-04 22:30:00	23.472	22.369	26.109	24.653	22.106	21.939
2019-02-04 23:00:00	23.112	21.748	25.428	23.857	21.676	21.485
2019-02-04 23:30:00	22.944	21.056	25.113	22.848	21.413	20.96
2019-02-05	22.8	20.341	24.677	22.321	21.127	20.531
2019-02-05 00:30:00	22.345	19.698	24.267	21.772	20.507	19.984
2019-02-05 01:00:00	21.151	19.127	23.954	20.698	20.126	19.318
2019-02-05 01:30:00	21.557	18.271	23.569	19.793	19.793	18.652
2019-02-05 02:00:00	21.843	17.201	23.761	19.175	19.508	17.32
2019-02-05 02:30:00	20.722	17.796	22.585	19.056	18.461	17.177
2019-02-05 03:00:00	20.746	17.51	21.915	18.604	18.557	17.391
2019-02-05 03:30:00	19.199	17.344	21.819	18.509	18.247	17.225
2019-02-05 04:00:00	20.15	15.915	21.461	17.391	18.01	15.986
2019-02-05 04:30:00	18.01	14.218	22.082	16.32	17.486	14.745
2019-02-05 05:00:00	15.796	13.016	21.318	15.27	16.606	13.738
2019-02-05 05:30:00	14.745	12.582	21.485	15.031	16.034	13.281
2019-02-05 06:00:00	14.84	11.759	21.127	14.649	16.106	12.678
2019-02-05 06:30:00	15.533	11.419	20.65	14.266	15.986	12.147
2019-02-05 07:00:00	13.57	10.761	20.674	13.546	15.294	11.929
2019-02-05 07:30:00	13.546	11.637	20.222	13.786	17.986	14.361
2019-02-05 08:00:00	18.033	15.175	19.627	14.266	18.794	21.413
2019-02-05 08:30:00	20.793	19.246	19.532	15.939	20.365	27.554
2019-02-05 09:00:00	22.226	20.936	20.174	17.843	22.585	31.382
2019-02-05 09:30:00	21.079	22.011	20.126	18.604	23.857	34.677
2019-02-05 10:00:00	21.008	23.232	20.126	19.08	25.987	40.891
2019-02-05 10:30:00	25.307	30.52	20.317	19.555	26.916	44.627
2019-02-05 11:00:00	23.713	29.19	20.841	21.246	29.04	46.481
2019-02-05 11:30:00	24.243	30.167	21.581	23.04	31.382	48.504
2019-02-05 12:00:00	25.016	30.798	22.202	25.258	32.794	48.604
2019-02-05 12:30:00	25.647	30.117	22.633	27.014	33.757	45.908
2019-02-05 13:00:00	26.231	30.217	22.609	27.85	31.791	41.123
2019-02-05 13:30:00	26.549	29.89	22.8	28.295	32.047	40
2019-02-05 14:00:00	28.766	39.375	23.472	45.53	31.816	39.431
2019-02-05 14:30:00	27.899	32.304	24.171	34.387	32.717	38.812
2019-02-05 15:00:00	28.667	33.835	25.428	37.453	32.021	36.824
2019-02-05 15:30:00	28.493	30.925	25.55	32.124	31.204	35.395
2019-02-05 16:00:00	27.998	29.715	25.501	30.293	30.041	32.949
2019-02-05 16:30:00	27.85	29.439	25.744	29.966	29.665	32.175
2019-02-05 17:00:00	27.924	29.19	26.134	30.167	28.717	30.444
2019-02-05 17:30:00	27.727	29.215	26.134	30.545	28.171	29.715
2019-02-05 18:00:00	27.259	27.186	25.744	27.776	27.186	28.345
2019-02-05 18:30:00	26.329	25.793	25.065	26.061	26.451	27.308
2019-02-05 19:00:00	26.524	28.171	25.404	28.667	26.28	26.891
2019-02-05 19:30:00	25.258	24.002	24.388	24.363	24.944	25.355
2019-02-05 20:00:00	25.113	26.451	24.532	26.818	24.436	24.46
2019-02-05 20:30:00	24.46	23.905	24.002	24.653	23.665	23.448
2019-02-05 21:00:00	23.665	21.342	23.28	21.963	22.896	22.178
2019-02-05 21:30:00	23.064	19.746	22.753	20.269	22.321	21.7
2019-02-05 22:00:00	22.992	18.866	23.208	19.888	21.987	20.079
2019-02-05 22:30:00	20.793	17.51	22.848	18.889	21.079	18.913
2019-02-05 23:00:00	19.199	15.772	22.561	17.463	20.031	17.296
2019-02-05 23:30:00	17.701	15.175	22.609	17.534	19.436	16.654
2019-02-06	17.082	14.409	22.154	16.749	18.937	15.819
2019-02-06 00:30:00	16.082	14.122	21.867	16.558	18.271	15.485
2019-02-06 01:00:00	15.199	12.944	21.557	15.7	17.843	14.625
2019-02-06 01:30:00	14.385	11.613	20.889	14.361	17.249	13.329
2019-02-06 02:00:00	13.281	10.736	20.531	13.738	16.582	12.364
2019-02-06 02:30:00	12.968	10.858	20.198	13.81	16.511	12.437
2019-02-06 03:00:00	13.016	10.834	20.079	13.906	16.511	12.582
2019-02-06 03:30:00	12.871	10.59	19.746	13.618	16.32	12.316
2019-02-06 04:00:00	13.233	11.029	19.698	14.05	16.344	12.775
2019-02-06 04:30:00	15.008	11.516	19.817	14.122	16.582	12.654
2019-02-06 05:00:00	13.329	10.1	19.27	13.257	15.867	12.074
2019-02-06 05:30:00	11.589	9.015	18.985	12.147	14.984	11.224
2019-02-06 06:00:00	10.834	8.319	18.652	11.516	14.242	10.394
2019-02-06 06:30:00	10.1	7.217	17.915	10.59	13.834	9.139
2019-02-06 07:00:00	9.534	7.116	17.748	10.516	13.546	9.064
2019-02-06 07:30:00	10.1	7.845	17.558	10.712	16.749	12.001
2019-02-06 08:00:00	14.816	12.195	17.558	11.759	17.891	20.507
2019-02-06 08:30:00	16.225	15.461	17.677	12.703	18.842	26.036
2019-02-06 09:00:00	17.915	16.677	17.011	13.497	18.937	26.426
2019-02-06 09:30:00	16.892	16.129	17.13	13.882	20.436	29.64
2019-02-06 10:00:00	18.937	20.984	17.177	15.27	22.705	35.075
2019-02-06 10:30:00	18.58	21.628	17.344	17.344	24.774	36.824
2019-02-06 11:00:00	18.271	20.269	17.463	18.889	25.113	33.6
2019-02-06 11:30:00	18.057	19.912	17.391	18.866	25.477	32.717
2019-02-06 12:00:00	18.604	21.294	17.629	19.888	25.939	32.587
2019-02-06 12:30:00	19.08	22.776	17.891	21.39	26.036	32.691
2019-02-06 13:00:00	21.151	27.014	18.58	25.574	25.525	32.227
2019-02-06 13:30:00	21.7	26.085	18.937	28.171	25.162	31.204
2019-02-06 14:00:00	21.103	27.014	19.27	32.278	26.867	32.794
2019-02-06 14:30:00	21.557	23.713	20.079	36.308	26.426	31.433
2019-02-06 15:00:00	22.417	29.991	20.817	35.262	25.258	29.265
2019-02-06 15:30:00	22.753	32.949	21.223	38.812	25.113	27.308
2019-02-06 16:00:00	23.208	28.245	21.772	31.484	24.895	26.867
2019-02-06 16:30:00	23.256	27.333	21.676	28.816	25.404	27.481
2019-02-06 17:00:00	23.16	26.231	21.772	28.394	24.726	26.5
2019-02-06 17:30:00	23.088	25.016	21.795	26.475	23.978	25.21
2019-02-06 18:00:00	22.657	23.352	21.509	24.291	23.328	24.195
2019-02-06 18:30:00	21.795	22.274	21.103	22.561	22.705	23.304
2019-02-06 19:00:00	22.178	25.768	21.7	26.72	22.178	22.274
2019-02-06 19:30:00	21.867	24.968	21.413	25.623	21.151	20.984
2019-02-06 20:00:00	21.413	23.256	21.199	24.339	20.603	19.841
2019-02-06 20:30:00	20.746	19.746	20.674	21.079	19.888	18.224
2019-02-06 21:00:00	19.436	15.318	20.103	16.415	19.246	17.011
2019-02-06 21:30:00	18.461	13.858	19.532	14.936	18.652	15.652
2019-02-06 22:00:00	17.32	13.161	18.937	14.05	17.891	14.84
2019-02-06 22:30:00	15.963	12.292	18.057	13.04	17.296	14.266
2019-02-06 23:00:00	15.175	11.37	17.724	12.171	16.844	13.546
2019-02-06 23:30:00	14.792	10.687	17.51	11.71	16.606	12.727
2019-02-07	13.93	10.1	16.749	11.053	15.915	12.001
2019-02-07 00:30:00	13.137	9.509	16.153	10.443	15.27	11.151
2019-02-07 01:00:00	12.268	9.238	15.342	10.001	14.888	10.736
2019-02-07 01:30:00	11.807	8.568	15.247	9.41	14.816	10.247
2019-02-07 02:00:00	11.127	8.02	14.697	8.817	14.218	9.632
2019-02-07 02:30:00	10.761	7.82	14.337	8.668	14.17	9.509
2019-02-07 03:00:00	10.467	7.393	14.17	8.27	13.594	8.866
2019-02-07 03:30:00	10.32	7.041	14.098	8.02	13.546	8.419
2019-02-07 04:00:00	9.928	7.091	13.69	7.97	12.654	8.145
2019-02-07 04:30:00	9.262	6.077	13.882	7.72	12.364	8.27
2019-02-07 05:00:00	9.46	5.385	14.337	7.217	12.098	7.594
2019-02-07 05:30:00	9.312	5.847	13.546	6.864	12.751	7.368
2019-02-07 06:00:00	8.494	3.617	13.714	6	11.589	6
2019-02-07 06:30:00	8.543	4.973	12.098	6.204	10.736	6.433
2019-02-07 07:00:00	7.72	4.714	11.419	5.898	10.761	6.458
2019-02-07 07:30:00	6.864	3.142	12.751	5.591	10.516	5.334
2019-02-07 08:00:00	9.163	6.712	12.558	5.796	13.329	13.209
2019-02-07 08:30:00	12.775	10.149	12.703	7.167	14.074	17.843
2019-02-07 09:00:00	16.177	13.088	12.727	8.319	15.127	22.848
2019-02-07 09:30:00	12.92	13.594	12.727	9.731	17.558	28.791
2019-02-07 10:00:00	12.122	12.389	12.364	9.312	17.249	26.671
2019-02-07 10:30:00	15.652	16.606	12.727	10.345	18.557	29.69
2019-02-07 11:00:00	18.985	23.112	13.04	10.736	19.341	33.313
2019-02-07 11:30:00	14.505	19.294	13.305	12.195	22.465	38.143
2019-02-07 12:00:00	15.342	22.13	13.69	12.775	24.05	40.171
2019-02-07 12:30:00	16.511	24.532	14.146	13.882	24.315	40.631
2019-02-07 13:00:00	17.582	25.234	14.457	14.457	23.978	39.234
2019-02-07 13:30:00	18.295	20.412	14.697	32.924	23.448	34.889
2019-02-07 14:00:00	19.436	28.692	15.39	37.645	23.641	30.52
2019-02-07 14:30:00	18.652	19.318	16.534	32.047	24.436	30.066
2019-02-07 15:00:00	19.698	28.916	17.439	34.969	23.593	28.097
2019-02-07 15:30:00	20.65	32.846	18.461	39.63	23.112	24.944
2019-02-07 16:00:00	21.39	32.381	19.46	37.645	22.848	23.905
2019-02-07 16:30:00	22.226	30.596	20.293	35.475	22.657	23.328
2019-02-07 17:00:00	22.465	29.065	20.817	33.053	22.274	22.8
2019-02-07 17:30:00	22.537	27.924	21.318	31.052	21.843	22.274
2019-02-07 18:00:00	22.896	28.122	21.604	30.646	21.461	21.795
2019-02-07 18:30:00	22.776	32.846	21.557	35.877	21.032	21.175
2019-02-07 19:00:00	23.088	27.702	21.748	29.015	20.65	20.746
2019-02-07 19:30:00	22.585	25.065	21.461	26.134	20.055	19.984
2019-02-07 20:00:00	21.987	23.208	21.199	24.798	19.698	19.365
2019-02-07 20:30:00	21.032	18.461	20.889	19.294	19.08	18.271
2019-02-07 21:00:00	20.174	16.249	20.365	17.415	18.2	17.177
2019-02-07 21:30:00	18.889	15.27	18.889	16.177	17.177	16.344
2019-02-07 22:00:00	17.51	14.888	18.295	15.39	17.391	15.867
2019-02-07 22:30:00	16.654	13.834	17.368	14.649	16.082	14.936
2019-02-07 23:00:00	16.892	12.871	18.295	14.098	16.082	13.882
2019-02-07 23:30:00	16.701	11.516	18.461	13.401	15.7	12.437
2019-02-08	16.106	10.638	18.01	12.147	15.342	11.71
2019-02-08 00:30:00	14.984	10.761	17.13	11.759	15.438	12.025
2019-02-08 01:00:00	14.864	9.928	17.653	11.273	14.96	10.687
2019-02-08 01:30:00	14.385	9.312	17.13	10.932	14.122	9.952
2019-02-08 02:00:00	14.074	9.262	17.011	10.858	14.266	9.854
2019-02-08 02:30:00	13.666	9.534	16.415	10.834	14.266	10.124
2019-02-08 03:00:00	13.497	8.841	16.582	10.467	13.834	9.558
2019-02-08 03:30:00	13.642	8.22	16.82	10.98	13.473	9.361
2019-02-08 04:00:00	13.305	8.17	16.415	10.565	13.209	9.139
2019-02-08 04:30:00	13.233	7.519	16.439	10.247	12.992	8.841
2019-02-08 05:00:00	12.871	7.217	16.129	10.173	12.799	8.717
2019-02-08 05:30:00	12.05	6.357	15.843	9.583	12.485	8.145
2019-02-08 06:00:00	9.435	5.128	15.438	8.319	11.394	6.914
2019-02-08 06:30:00	7.217	3.775	14.936	7.242	10.345	5.514
2019-02-08 07:00:00	6.281	3.354	14.673	6.813	9.952	4.818
2019-02-08 07:30:00	7.041	4.141	14.218	6.99	12.63	7.795
2019-02-08 08:00:00	12.122	8.891	14.074	8.12	15.055	18.604
2019-02-08 08:30:00	13.209	11.565	14.601	9.213	15.7	23.112
2019-02-08 09:00:00	13.088	12.654	14.218	10.296	17.034	27.407
2019-02-08 09:30:00	13.834	14.601	13.93	10.492	18.652	31.357
2019-02-08 10:00:00	18.271	20.007	14.314	11.273	19.127	34.019
2019-02-08 10:30:00	15.366	18.319	14.457	13.161	22.202	35.716
2019-02-08 11:00:00	15.509	18.366	14.912	14.505	23.785	37.7
2019-02-08 11:30:00	16.582	20.412	15.605	15.629	25.453	38.952
2019-02-08 12:00:00	18.319	25.162	15.891	16.153	25.817	41.443
2019-02-08 12:30:00	18.461	24.363	16.463	17.272	27.431	41.502
2019-02-08 13:00:00	19.603	25.817	17.225	18.604	28.369	40.286
2019-02-08 13:30:00	19.984	21.199	17.867	29.365	28.345	36.444
2019-02-08 14:00:00	20.841	25.355	18.652	31.459	28.196	33.757
2019-02-08 14:30:00	21.724	22.298	19.579	32.949	27.284	31.97
2019-02-08 15:00:00	22.633	29.19	20.222	34.44	25.963	29.941
2019-02-08 15:30:00	23.328	33.339	20.841	39.488	25.065	27.014
2019-02-08 16:00:00	24.098	32.536	21.604	37.178	24.629	25.89
2019-02-08 16:30:00	24.436	30.824	22.226	35.155	24.243	25.21
2019-02-08 17:00:00	24.219	28.717	22.345	31.893	23.545	24.388
2019-02-08 17:30:00	24.146	29.991	22.537	33.053	23.16	23.713
2019-02-08 18:00:00	24.002	29.09	22.561	31.357	22.681	23.16
2019-02-08 18:30:00	23.424	27.924	22.298	29.24	21.915	22.226
2019-02-08 19:00:00	22.992	26.353	22.082	27.063	21.27	21.485
2019-02-08 19:30:00	22.298	25.428	21.7	25.963	20.365	20.293
2019-02-08 20:00:00	21.795	23.713	21.318	24.146	19.746	19.365
2019-02-08 20:30:00	20.674	19.365	20.698	20.222	19.127	18.39
2019-02-08 21:00:00	19.103	16.534	19.698	17.153	18.176	17.082
2019-02-08 21:30:00	17.986	15.676	19.103	16.153	17.605	16.368
2019-02-08 22:00:00	17.32	14.601	18.747	15.27	17.153	15.39
2019-02-08 22:30:00	17.106	13.522	18.937	14.625	16.939	14.816
2019-02-08 23:00:00	16.749	12.775	18.794	13.81	16.415	13.064
2019-02-08 23:30:00	15.318	13.016	17.486	13.57	15.581	13.57
2019-02-09	14.361	11.71	16.701	12.292	15.318	12.703
2019-02-09 00:30:00	14.457	10.394	16.868	11.467	15.366	11.565
2019-02-09 01:00:00	12.147	8.419	17.32	10.761	14.002	10.296
2019-02-09 01:30:00	12.413	7.519	17.106	10.1	13.473	9.114
2019-02-09 02:00:00	8.941	6.661	16.939	9.485	12.074	8.17
2019-02-09 02:30:00	7.67	5.257	15.963	8.494	11.662	7.091
2019-02-09 03:00:00	6.712	4.376	15.796	7.895	10.907	6.077
2019-02-09 03:30:00	9.435	4.584	15.175	7.116	11.053	5.514
2019-02-09 04:00:00	10.1	7.77	13.57	8.792	11.175	7.293
2019-02-09 04:30:00	10.271	8.145	13.666	9.188	11.54	7.97
2019-02-09 05:00:00	9.952	7.795	13.401	8.618	11.662	7.645
2019-02-09 05:30:00	9.608	7.745	12.871	8.469	11.248	7.92
2019-02-09 06:00:00	9.509	8.12	12.292	8.593	11.929	8.369
2019-02-09 06:30:00	9.361	7.995	12.147	8.494	11.759	8.469
2019-02-09 07:00:00	9.015	7.569	12.025	8.12	10.712	8.045
2019-02-09 07:30:00	8.916	7.845	11.686	8.02	13.064	10.32
2019-02-09 08:00:00	9.336	9.064	11.492	8.618	13.834	14.936
2019-02-09 08:30:00	9.805	10.516	11.565	9.386	14.768	18.105
2019-02-09 09:00:00	10.492	11.662	11.904	10.149	16.106	22.154
2019-02-09 09:30:00	11.443	12.992	12.195	10.834	16.511	24.581
2019-02-09 10:00:00	12.195	14.05	12.678	11.686	19.627	28.593
2019-02-09 10:30:00	12.871	15.031	13.016	12.364	20.793	29.115
2019-02-09 11:00:00	13.906	17.272	13.594	13.425	22.489	32.175
2019-02-09 11:30:00	14.697	18.842	13.978	13.978	23.448	33.495
2019-02-09 12:00:00	15.605	20.936	14.337	14.481	24.315	37.069
2019-02-09 12:30:00	16.272	22.226	14.673	15.127	24.726	37.398
2019-02-09 13:00:00	16.892	21.008	15.557	16.439	26.5	35.743
2019-02-09 13:30:00	17.51	18.343	16.01	26.475	25.065	32.33
2019-02-09 14:00:00	18.461	23.28	16.558	30.824	25.186	30.495
2019-02-09 14:30:00	18.58	18.58	17.153	27.333	24.436	28.369
2019-02-09 15:00:00	19.579	26.622	17.843	32.201	23.28	26.329
2019-02-09 15:30:00	20.436	28.468	18.557	33.339	22.896	24.098
2019-02-09 16:00:00	20.531	25.258	19.127	29.19	22.393	23.232
2019-02-09 16:30:00	20.388	24.581	19.413	28.097	21.795	22.321
2019-02-09 17:00:00	20.031	23.857	19.27	26.524	20.96	21.342
2019-02-09 17:30:00	19.674	22.992	19.151	25.501	20.269	20.436
2019-02-09 18:00:00	19.127	22.058	18.866	23.713	19.508	19.508
2019-02-09 18:30:00	18.509	21.008	18.438	22.202	18.699	18.604
2019-02-09 19:00:00	18.105	20.507	18.152	21.318	18.081	17.748
2019-02-09 19:30:00	17.13	18.557	17.463	18.889	17.106	16.749
2019-02-09 20:00:00	16.034	16.701	16.654	17.082	16.153	15.557
2019-02-09 20:30:00	14.792	13.209	15.748	13.738	15.461	14.553
2019-02-09 21:00:00	13.93	12.292	15.223	12.727	15.008	13.666
2019-02-09 21:30:00	13.257	11.71	14.768	12.147	14.29	12.944
2019-02-09 22:00:00	12.871	11.394	14.553	11.856	14.17	12.437
2019-02-09 22:30:00	12.413	10.932	14.074	11.419	13.786	11.856
2019-02-09 23:00:00	12.05	10.345	13.594	10.98	13.377	11.224
2019-02-09 23:30:00	11.686	10.1	13.161	10.687	13.161	10.907
2019-02-10	11.248	9.213	13.064	9.805	13.064	10.149
2019-02-10 00:30:00	11.078	9.558	12.968	10.1	12.606	10.149
2019-02-10 01:00:00	10.932	9.756	12.823	10.198	12.606	10.173
2019-02-10 01:30:00	10.761	9.46	12.678	9.903	12.219	10.026
2019-02-10 02:00:00	10.565	8.866	12.509	9.46	12.243	9.46
2019-02-10 02:30:00	10.149	8.07	12.292	8.742	12.171	8.618
2019-02-10 03:00:00	9.854	7.92	12.001	8.519	11.832	8.369
2019-02-10 03:30:00	9.583	7.368	11.686	7.995	11.783	8.17
2019-02-10 04:00:00	9.114	6.788	11.443	7.444	11.516	7.67
2019-02-10 04:30:00	8.841	6.94	11.248	7.544	11.589	7.72
2019-02-10 05:00:00	8.668	6.94	11.102	7.619	11.248	7.72
2019-02-10 05:30:00	8.742	6.484	11.321	7.368	11.492	7.419
2019-02-10 06:00:00	8.668	7.167	11.053	7.87	10.883	7.67
2019-02-10 06:30:00	8.469	6.509	11.078	7.318	11.151	7.091
2019-02-10 07:00:00	8.444	6.965	11.175	7.72	11.516	7.192
2019-02-10 07:30:00	8.494	7.343	11.078	7.895	11.613	8.02
2019-02-10 08:00:00	8.519	7.77	11.127	8.469	12.098	8.543
2019-02-10 08:30:00	8.717	8.344	11.127	8.941	11.929	9.188
2019-02-10 09:00:00	8.99	9.41	11.175	9.879	12.606	10.492
2019-02-10 09:30:00	9.46	10.32	11.151	10.565	12.968	11.807
2019-02-10 10:00:00	10.173	11.565	11.467	11.71	14.553	15.008
2019-02-10 10:30:00	10.59	11.904	11.71	12.268	14.385	14.577
2019-02-10 11:00:00	10.834	11.856	11.783	12.074	14.385	14.266
2019-02-10 11:30:00	11.078	11.977	11.856	12.098	14.314	14.266
2019-02-10 12:00:00	11.273	12.775	11.977	12.775	14.792	15.008
2019-02-10 12:30:00	11.151	12.268	11.88	12.122	14.745	14.888
2019-02-10 13:00:00	11.029	11.443	11.565	11.54	14.385	13.546
2019-02-10 13:30:00	11.175	13.522	11.807	13.762	15.629	16.511
2019-02-10 14:00:00	11.2	12.461	11.783	12.63	16.272	17.486
2019-02-10 14:30:00	10.638	9.78	11.151	9.583	14.673	14.505
2019-02-10 15:00:00	9.756	9.238	10.59	9.188	13.858	12.896
2019-02-10 15:30:00	10.222	11.759	11.102	12.243	15.438	14.673
2019-02-10 16:00:00	11.613	15.772	12.098	18.319	15.509	15.533
2019-02-10 16:30:00	13.329	17.415	13.497	20.555	15.39	15.008
2019-02-10 17:00:00	14.122	19.032	14.098	22.13	15.342	14.984
2019-02-10 17:30:00	14.768	19.127	14.673	22.034	15.485	14.936
2019-02-10 18:00:00	14.074	17.938	14.242	19.793	14.673	14.122
2019-02-10 18:30:00	13.786	17.034	14.266	18.699	14.146	13.642
2019-02-10 19:00:00	13.137	13.594	13.546	14.697	13.401	12.751
2019-02-10 19:30:00	12.001	13.69	12.751	14.337	13.088	12.437
2019-02-10 20:00:00	11.467	12.896	12.34	13.377	12.34	11.37
2019-02-10 20:30:00	10.198	8.965	11.346	9.805	11.078	9.805
2019-02-10 21:00:00	9.386	7.041	11.127	7.67	11.053	8.668
2019-02-10 21:30:00	8.469	6.077	10.59	6.636	10.222	7.519
2019-02-10 22:00:00	6.712	5.949	11.516	7.015	9.114	6.914
2019-02-10 22:30:00	5.847	5.462	11.419	6.914	8.07	6.026
2019-02-10 23:00:00	5.642	5.437	11.224	7.242	8.295	6
2019-02-10 23:30:00	7.268	5.102	10.565	6.281	9.805	6.331
2019-02-11	6.458	3.696	9.608	4.532	9.386	5.437
2019-02-11 00:30:00	6.102	1.994	10.345	4.272	8.643	4.324
2019-02-11 01:00:00	6.56	1.153	10.736	4.089	8.145	3.142
2019-02-11 01:30:00	6.23	1.425	10.394	3.854	8.195	3.195
2019-02-11 02:00:00	5.05	0.467	10.32	3.459	7.594	2.45
2019-02-11 02:30:00	2.956	-0.255	10.051	2.717	6.204	1.697
2019-02-11 03:00:00	3.854	-1.015	9.731	2.503	6.255	0.825
2019-02-11 03:30:00	1.859	-1.527	9.139	1.967	5.975	0.329
2019-02-11 04:00:00	0.934	-1.986	8.767	0.989	5.385	-0.116
2019-02-11 04:30:00	0.384	-2.888	8.319	1.017	5.205	-1.071
2019-02-11 05:00:00	-0.845	-3.479	7.77	0.19	4.298	-1.756
2019-02-11 05:30:00	-1.527	-3.777	7.419	-0.395	4.037	-1.929
2019-02-11 06:00:00	-1.785	-4.257	7.217	-0.339	3.775	-2.421
2019-02-11 06:30:00	-1.67	-4.439	7.015	-0.732	3.906	-2.45
2019-02-11 07:00:00	-2.16	-4.469	6.433	-1.071	3.591	-2.596
2019-02-11 07:30:00	-1.47	-3.538	6.484	-0.873	5.024	-0.648
2019-02-11 08:00:00	2.557	-0.479	6.408	0.246	7.242	7.645
2019-02-11 08:30:00	7.015	4.532	7.041	2.903	8.643	12.534
2019-02-11 09:00:00	9.805	7.015	7.268	4.272	9.435	15.557
2019-02-11 09:30:00	12.05	9.386	7.444	5.179	10.369	18.2
2019-02-11 10:00:00	13.834	12.05	7.72	6.306	11.565	21.175
2019-02-11 10:30:00	13.666	13.69	8.245	7.695	13.93	21.724
2019-02-11 11:00:00	14.84	16.296	8.668	8.916	13.738	22.824
2019-02-11 11:30:00	14.529	17.938	9.262	10.001	13.978	21.652
2019-02-11 12:00:00	15.055	20.031	9.756	11.005	14.505	22.92
2019-02-11 12:30:00	15.223	22.226	10.173	11.807	15.199	23.448
2019-02-11 13:00:00	15.39	21.772	10.638	12.485	15.843	22.776
2019-02-11 13:30:00	15.27	15.819	11.175	28.369	15.772	20.388
2019-02-11 14:00:00	14.697	20.031	11.856	30.343	16.034	19.032
2019-02-11 14:30:00	14.481	16.249	12.823	33.339	15.748	18.129
2019-02-11 15:00:00	14.361	28.419	13.57	39.8	15.485	16.558
2019-02-11 15:30:00	14.816	29.065	14.361	37.042	15.796	16.058
2019-02-11 16:00:00	15.055	30.041	15.175	37.755	15.652	15.772
2019-02-11 16:30:00	15.175	30.495	15.772	39.8	15.533	15.485
2019-02-11 17:00:00	15.294	29.065	16.177	34.783	15.652	15.629
2019-02-11 17:30:00	15.366	31.001	16.749	37.288	15.629	15.557
2019-02-11 18:00:00	15.223	29.19	17.082	32.949	15.318	15.318
2019-02-11 18:30:00	15.008	27.899	17.32	32.047	15.127	15.031
2019-02-11 19:00:00	14.888	26.72	17.772	31.51	14.864	14.816
2019-02-11 19:30:00	14.649	24.726	17.843	28.444	14.553	14.457
2019-02-11 20:00:00	14.314	22.633	17.653	25.307	14.194	13.906
2019-02-11 20:30:00	13.882	17.225	17.748	21.246	13.57	13.016
2019-02-11 21:00:00	12.34	13.522	17.463	17.058	12.703	11.37
2019-02-11 21:30:00	11.273	11.904	17.439	15.414	12.05	10.222
2019-02-11 22:00:00	10.761	10.785	17.058	14.266	11.832	9.706
2019-02-11 22:30:00	11.2	10.001	16.844	13.449	11.467	9.509
2019-02-11 23:00:00	11.394	10.1	16.129	13.161	11.102	9.903
2019-02-11 23:30:00	11.078	9.287	15.772	12.389	10.98	9.46
2019-02-12	11.078	9.015	14.936	11.904	10.712	9.262
2019-02-12 00:30:00	10.858	8.469	14.673	11.37	10.467	9.015
2019-02-12 01:00:00	10.565	8.469	14.074	10.98	10.222	8.99
2019-02-12 01:30:00	10.541	8.344	13.449	10.687	10.296	8.99
2019-02-12 02:00:00	10.467	8.295	13.088	10.369	10.051	8.941
2019-02-12 02:30:00	10.198	7.92	12.727	10.051	10.1	8.717
2019-02-12 03:00:00	9.657	7.167	12.751	9.312	9.485	7.97
2019-02-12 03:30:00	9.361	6.763	12.389	8.965	9.534	7.695
2019-02-12 04:00:00	9.015	6.026	12.413	8.419	9.015	7.116
2019-02-12 04:30:00	7.318	4.22	12.558	6.813	8.693	5.411
2019-02-12 05:00:00	6.306	3.722	12.316	6.611	8.394	4.999
2019-02-12 05:30:00	5.179	3.485	12.074	6.255	7.72	4.402
2019-02-12 06:00:00	4.844	3.116	11.662	5.591	7.419	4.298
2019-02-12 06:30:00	6.687	4.272	10.858	6.864	8.295	5.385
2019-02-12 07:00:00	5.102	2.557	11.175	5.257	7.695	3.827
2019-02-12 07:30:00	4.272	2.128	10.638	4.194	8.369	4.402
2019-02-12 08:00:00	7.87	5.385	10.956	5.565	10.247	11.88
2019-02-12 08:30:00	10.32	9.064	10.858	6.965	11.953	16.558
2019-02-12 09:00:00	12.243	11.273	10.59	7.77	12.775	19.722
2019-02-12 09:30:00	13.425	12.775	10.614	8.618	14.745	21.604
2019-02-12 10:00:00	14.96	15.247	10.883	9.435	16.225	23.376
2019-02-12 10:30:00	15.7	17.106	11.2	10.173	17.034	23.521
2019-02-12 11:00:00	15.939	18.176	11.443	10.712	18.485	23.761
2019-02-12 11:30:00	16.463	19.318	12.001	11.929	18.985	23.569
2019-02-12 12:00:00	17.082	21.461	12.437	12.847	19.365	24.919
2019-02-12 12:30:00	17.558	23.545	12.871	13.642	19.984	25.987
2019-02-12 13:00:00	17.701	22.345	13.401	14.457	20.674	24.219
2019-02-12 13:30:00	17.701	18.033	13.882	32.639	20.531	22.776
2019-02-12 14:00:00	17.177	20.841	15.079	34.44	19.936	20.841
2019-02-12 14:30:00	17.32	18.438	16.153	36.796	19.436	20.674
2019-02-12 15:00:00	17.463	27.801	16.463	37.37	18.818	19.508
2019-02-12 15:30:00	17.748	31.052	17.391	40.114	18.866	18.937
2019-02-12 16:00:00	18.509	32.742	17.843	38.17	19.032	19.032
2019-02-12 16:30:00	18.366	32.562	18.937	40.171	18.818	18.866
2019-02-12 17:00:00	19.032	32.742	18.723	35.689	18.747	18.889
2019-02-12 17:30:00	18.319	32.768	20.365	41.648	18.39	18.628
2019-02-12 18:00:00	19.056	32.587	19.508	36.173	18.461	18.604
2019-02-12 18:30:00	18.699	33.365	20.603	38.393	18.247	18.509
2019-02-12 19:00:00	18.58	31.74	21.199	37.261	17.915	18.271
2019-02-12 19:30:00	18.509	29.515	21.008	33.365	17.605	17.986
2019-02-12 20:00:00	18.129	27.801	21.39	32.742	17.082	17.415
2019-02-12 20:30:00	17.558	21.079	20.841	25.671	16.511	16.582
2019-02-12 21:00:00	17.034	17.962	20.555	21.509	15.629	15.175
2019-02-12 21:30:00	16.32	16.558	20.246	19.222	15.318	14.864
2019-02-12 22:00:00	16.272	15.796	20.007	18.414	14.912	14.433
2019-02-12 22:30:00	16.487	14.84	19.27	16.963	14.601	13.546
2019-02-12 23:00:00	16.439	14.29	18.176	15.867	14.242	13.161
2019-02-12 23:30:00	15.843	13.786	18.58	15.939	14.122	13.329
2019-02-13	15.557	13.064	18.414	15.414	14.002	12.823
2019-02-13 00:30:00	15.461	13.137	17.724	14.864	13.93	12.823
2019-02-13 01:00:00	15.294	12.606	17.32	14.361	13.497	12.34
2019-02-13 01:30:00	15.103	12.292	16.868	13.882	13.064	11.783
2019-02-13 02:00:00	14.673	11.467	17.011	13.377	12.847	11.175
2019-02-13 02:30:00	13.546	10.247	16.796	12.485	12.582	10.394
2019-02-13 03:00:00	13.233	9.608	16.654	11.783	12.268	9.952
2019-02-13 03:30:00	11.71	8.99	16.511	11.37	11.807	9.435
2019-02-13 04:00:00	9.509	7.82	15.867	10.124	10.687	8.369
2019-02-13 04:30:00	8.668	7.015	15.509	9.386	10.345	7.393
2019-02-13 05:00:00	8.394	6.509	15.27	9.312	10.296	6.99
2019-02-13 05:30:00	7.82	5.745	14.864	8.618	9.854	6.357
2019-02-13 06:00:00	7.116	5.179	14.697	8.319	9.163	5.539
2019-02-13 06:30:00	7.87	4.869	14.17	8.22	9.706	5.437
2019-02-13 07:00:00	7.695	4.662	14.122	8.195	9.632	5.514
2019-02-13 07:30:00	8.419	5.128	13.858	8.419	11.102	6.839
2019-02-13 08:00:00	12.437	8.99	13.714	9.435	13.281	16.844
2019-02-13 08:30:00	13.401	12.992	14.026	11.127	14.721	22.417
2019-02-13 09:00:00	13.93	14.936	14.337	12.461	16.725	27.136
2019-02-13 09:30:00	15.748	17.701	14.385	13.161	18.557	31.561
2019-02-13 10:00:00	16.606	20.15	14.745	14.505	20.507	36.119
2019-02-13 10:30:00	16.368	20.269	15.079	15.175	22.345	38.616
2019-02-13 11:00:00	18.01	23.713	15.963	17.368	25.21	41.766
2019-02-13 11:30:00	19.341	25.793	16.844	18.58	26.622	43.495
2019-02-13 12:00:00	20.579	27.505	17.605	19.627	27.579	45.499
2019-02-13 12:30:00	21.604	29.04	18.129	20.388	28.965	46.003
2019-02-13 13:00:00	22.298	26.573	18.937	21.485	30.041	43.768
2019-02-13 13:30:00	23.545	24.436	19.603	35.182	29.59	39.686
2019-02-13 14:00:00	24.05	25.939	20.746	34.334	29.715	36.796
2019-02-13 14:30:00	25.186	25.671	21.676	36.796	28.766	34.757
2019-02-13 15:00:00	26.085	32.355	22.465	37.425	27.604	31.561
2019-02-13 15:30:00	26.818	37.425	22.8	43.223	27.161	29.916
2019-02-13 16:00:00	27.308	34.15	23.978	37.673	27.014	28.941
2019-02-13 16:30:00	27.825	35.049	24.484	38.616	26.426	28.171
2019-02-13 17:00:00	28.295	36.308	25.162	39.403	26.012	27.628
2019-02-13 17:30:00	28.295	35.102	25.307	37.042	25.623	27.063
2019-02-13 18:00:00	28.245	33.835	25.38	36.065	24.968	26.426
2019-02-13 18:30:00	27.014	27.431	24.484	28.048	24.508	26.061
2019-02-13 19:00:00	26.304	27.235	24.243	28.072	23.737	25.137
2019-02-13 19:30:00	25.841	27.998	24.219	28.122	23.016	24.122
2019-02-13 20:00:00	24.774	25.404	23.545	25.72	22.106	22.896
2019-02-13 20:30:00	23.545	21.413	22.633	21.987	21.223	21.724
2019-02-13 21:00:00	22.441	20.007	22.13	20.341	20.388	20.555
2019-02-13 21:30:00	21.437	19.175	21.676	19.555	20.079	19.936
2019-02-13 22:00:00	20.341	18.129	20.889	18.461	19.103	18.818
2019-02-13 22:30:00	19.508	17.463	20.531	17.772	18.937	18.224
2019-02-13 23:00:00	18.937	16.677	19.984	17.082	18.675	17.891
2019-02-13 23:30:00	18.461	15.986	19.841	16.439	18.01	16.844
2019-02-14	17.938	15.294	19.389	15.867	17.534	16.272
2019-02-14 00:30:00	17.415	14.984	18.985	15.533	17.177	15.748
2019-02-14 01:00:00	16.963	14.745	18.509	15.27	17.13	15.629
2019-02-14 01:30:00	16.606	14.792	18.081	15.175	16.868	15.366
2019-02-14 02:00:00	16.272	14.098	17.986	14.625	16.249	14.601
2019-02-14 02:30:00	16.106	13.786	17.796	14.361	16.082	14.266
2019-02-14 03:00:00	15.796	12.823	17.582	13.57	15.533	13.618
2019-02-14 03:30:00	15.39	11.078	17.629	12.05	15.175	12.292
2019-02-14 04:00:00	14.96	11.613	17.249	12.485	14.792	11.88
2019-02-14 04:30:00	14.601	12.775	16.725	13.329	14.505	12.534
2019-02-14 05:00:00	14.29	11.807	16.582	12.485	14.314	11.516
2019-02-14 05:30:00	14.146	10.394	16.606	11.589	14.098	10.81
2019-02-14 06:00:00	13.714	10.418	15.939	11.297	13.738	11.078
2019-02-14 06:30:00	13.137	9.04	16.153	10.565	13.377	10.394
2019-02-14 07:00:00	10.907	7.795	15.796	9.731	12.558	9.114
2019-02-14 07:30:00	9.928	7.594	15.676	9.534	12.751	9.015
2019-02-14 08:00:00	14.385	11.224	15.414	10.492	15.772	19.96
2019-02-14 08:30:00	14.721	14.481	15.843	12.389	16.939	24.992
2019-02-14 09:00:00	18.081	17.772	15.796	13.449	18.652	28.543
2019-02-14 09:30:00	19.08	19.817	16.177	14.984	20.46	32.381
2019-02-14 10:00:00	22.561	23.28	16.225	15.366	21.199	34.624
2019-02-14 10:30:00	19.888	23.761	16.63	16.558	22.992	37.645
2019-02-14 11:00:00	20.079	24.508	17.201	17.558	25.404	39.431
2019-02-14 11:30:00	22.321	29.065	17.272	17.843	25.234	40.833
2019-02-14 12:00:00	20.603	26.085	18.01	18.866	28.245	43.556
2019-02-14 12:30:00	21.533	27.333	18.794	20.174	30.117	44.999
2019-02-14 13:00:00	22.25	25.841	18.937	20.77	28.841	42.654
2019-02-14 13:30:00	23.04	23.448	19.651	33.94	28.965	39.772
2019-02-14 14:00:00	24.412	25.793	20.222	40.833	27.825	35.262
2019-02-14 14:30:00	24.871	24.895	21.246	43.465	27.161	33.443
2019-02-14 15:00:00	25.671	35.958	21.748	44.472	27.308	31.535
2019-02-14 15:30:00	26.451	37.096	22.992	42.475	27.308	29.89
2019-02-14 16:00:00	27.186	35.262	24.195	39.036	27.407	29.34
2019-02-14 16:30:00	27.677	39.886	24.677	44.442	27.014	28.692
2019-02-14 17:00:00	28.468	39.545	25.307	43.556	26.598	28.196
2019-02-14 17:30:00	27.899	41.707	25.623	46.77	26.207	27.653
2019-02-14 18:00:00	29.19	37.315	26.085	40	26.28	27.604
2019-02-14 18:30:00	28.916	39.601	26.353	41.59	25.72	27.087
2019-02-14 19:00:00	29.215	34.519	26.378	36.281	25.258	26.524
2019-02-14 19:30:00	28.916	33.966	26.549	35.368	24.653	25.793
2019-02-14 20:00:00	28.518	33.209	26.451	33.495	24.05	24.944
2019-02-14 20:30:00	27.702	26.451	26.378	28.122	23.424	24.098
2019-02-14 21:00:00	26.916	24.146	25.404	24.702	22.513	22.729
2019-02-14 21:30:00	26.207	22.753	25.574	23.28	22.226	22.106
2019-02-14 22:00:00	25.501	21.939	25.089	22.441	21.819	21.533
2019-02-14 22:30:00	24.871	21.27	24.702	21.987	21.557	21.175
2019-02-14 23:00:00	23.809	20.246	23.448	21.342	20.793	20.627
2019-02-14 23:30:00	22.537	19.246	23.785	21.056	20.293	19.555
2019-02-15	19.175	17.082	23.328	19.08	18.675	17.225
2019-02-15 00:30:00	21.604	18.414	22.968	19.651	19.555	18.295
2019-02-15 01:00:00	21.079	17.368	23.088	19.436	19.222	17.748
2019-02-15 01:30:00	20.246	16.725	22.968	18.961	18.818	17.439
2019-02-15 02:00:00	20.412	15.652	22.561	17.938	18.366	16.749
2019-02-15 02:30:00	18.985	15.079	22.369	17.225	17.653	16.082
2019-02-15 03:00:00	18.985	17.153	21.843	18.414	18.866	18.224
2019-02-15 03:30:00	18.343	16.272	21.581	17.653	18.176	17.368
2019-02-15 04:00:00	18.818	15.748	21.366	17.368	17.962	16.677
2019-02-15 04:30:00	18.057	14.026	21.223	16.201	17.106	15.103
2019-02-15 05:00:00	16.249	13.185	20.841	15.414	16.415	14.218
2019-02-15 05:30:00	17.558	14.337	20.174	15.652	16.892	15.127
2019-02-15 06:00:00	15.676	12.485	20.222	14.745	16.058	13.714
2019-02-15 06:30:00	15.39	12.001	19.912	14.505	15.819	13.088
2019-02-15 07:00:00	14.122	11.467	19.651	13.906	15.151	12.582
2019-02-15 07:30:00	14.242	11.88	19.389	14.122	15.891	13.305
2019-02-15 08:00:00	18.224	14.673	19.032	14.745	18.129	21.772
2019-02-15 08:30:00	21.199	18.889	19.413	16.01	19.77	27.825
2019-02-15 09:00:00	22.968	21.987	19.413	16.844	21.628	32.691
2019-02-15 09:30:00	24.026	23.785	19.698	17.701	23.16	36.389
2019-02-15 10:00:00	27.825	27.161	19.651	18.414	23.376	37.921
2019-02-15 10:30:00	29.565	30.041	19.793	19.27	24.871	40.862
2019-02-15 11:00:00	29.84	31.052	20.341	21.318	25.574	38.365
2019-02-15 11:30:00	29.49	34.863	20.317	21.795	25.866	38.812
2019-02-15 12:00:00	31.23	38.032	20.722	22.585	27.825	43.163
2019-02-15 12:30:00	32.073	40	21.246	24.363	28.593	44.411
2019-02-15 13:00:00	32.227	35.155	21.772	24.919	30.469	42.445
2019-02-15 13:30:00	31.408	30.545	22.465	43.223	31.204	38.198
2019-02-15 14:00:00	30.646	31.714	23.593	49.309	31.459	36.362
2019-02-15 14:30:00	30.217	30.646	24.46	50.543	30.041	34.572
2019-02-15 15:00:00	30.117	41.825	25.21	50.473	29.89	32.975
2019-02-15 15:30:00	30.192	46.77	25.598	53.739	29.515	31.535
2019-02-15 16:00:00	30.571	47.092	26.378	53.074	29.464	31.077
2019-02-15 16:30:00	30.571	47.777	27.038	53.516	29.34	30.773
2019-02-15 17:00:00	30.849	46.738	27.702	51.383	29.04	30.419
2019-02-15 17:30:00	31.153	45.75	28.32	48.57	28.916	30.192
2019-02-15 18:00:00	30.217	48.67	28.866	53.479	28.245	29.59
2019-02-15 18:30:00	30.343	46.067	28.841	50.37	27.974	29.24
2019-02-15 19:00:00	30.066	45.154	29.389	47.974	27.554	28.791
2019-02-15 19:30:00	29.865	43.103	29.515	47.287	27.063	28.245
2019-02-15 20:00:00	29.464	40.2	29.941	44.257	26.353	27.481
2019-02-15 20:30:00	28.916	32.458	30.167	37.206	25.574	26.524
2019-02-15 21:00:00	25.939	27.974	29.64	30.798	23.978	24.05
2019-02-15 21:30:00	23.136	25.38	29.365	27.949	22.609	22.202
2019-02-15 22:00:00	22.321	23.569	28.891	26.207	22.202	21.151
2019-02-15 22:30:00	21.056	21.939	28.345	24.823	21.342	20.031
2019-02-15 23:00:00	19.532	20.246	27.85	23.472	20.46	18.889
2019-02-15 23:30:00	19.77	19.936	27.653	23.304	20.579	19.008
2019-02-16	23.088	21.795	26.891	24.363	21.604	20.436
2019-02-16 00:30:00	21.604	20.15	26.182	22.896	20.627	19.746
2019-02-16 01:00:00	21.366	18.866	25.866	21.987	20.293	18.794
2019-02-16 01:30:00	21.151	18.271	25.744	21.604	19.936	18.319
2019-02-16 02:00:00	19.127	17.034	25.695	20.555	19.008	16.844
2019-02-16 02:30:00	18.604	16.415	25.089	19.984	18.723	16.32
2019-02-16 03:00:00	20.746	18.39	25.186	21.366	19.841	18.057
2019-02-16 03:30:00	18.842	16.558	25.04	20.126	18.842	16.915
2019-02-16 04:00:00	17.344	15.151	23.833	18.033	17.986	15.796
2019-02-16 04:30:00	15.485	13.93	23.184	17.225	17.249	14.505
2019-02-16 05:00:00	14.601	13.137	22.513	16.272	16.701	13.69
2019-02-16 05:30:00	14.29	12.461	22.369	16.177	16.534	13.064
2019-02-16 06:00:00	13.978	12.122	21.867	15.748	16.177	13.016
2019-02-16 06:30:00	12.871	11.2	21.485	15.031	15.438	12.001
2019-02-16 07:00:00	12.654	10.736	20.817	14.314	15.318	11.662
2019-02-16 07:30:00	12.098	10.565	20.293	14.05	15.175	11.589
2019-02-16 08:00:00	15.891	13.449	20.269	15.127	17.724	19.508
2019-02-16 08:30:00	19.674	18.461	20.65	16.558	19.674	27.554
2019-02-16 09:00:00	19.318	20.46	21.27	18.771	21.557	30.646
2019-02-16 09:30:00	20.126	22.345	21.413	20.079	24.098	36.012
2019-02-16 10:00:00	21.7	25.234	21.557	20.889	25.89	39.943
2019-02-16 10:30:00	22.034	25.89	21.7	21.557	27.431	42.893
2019-02-16 11:00:00	23.136	27.899	22.178	22.561	29.414	45.436
2019-02-16 11:30:00	24.291	29.84	22.705	23.761	30.773	47.222
2019-02-16 12:00:00	25.38	31.586	23.376	24.968	32.278	48.205
2019-02-16 12:30:00	26.402	33.574	23.713	25.768	33.443	49.785
2019-02-16 13:00:00	28.345	32.278	24.05	26.744	33.443	47.417
2019-02-16 13:30:00	28.419	29.315	24.629	39.008	33.079	43.435
2019-02-16 14:00:00	29.79	30.748	24.847	46.931	32.742	41.327
2019-02-16 14:30:00	30.243	30.571	25.987	48.804	32.33	38.56
2019-02-16 15:00:00	30.722	40.891	27.014	47.352	31.919	36.146
2019-02-16 15:30:00	31.612	39.403	28.072	43.193	31.714	34.466
2019-02-16 16:00:00	32.227	39.943	29.015	44.565	31.052	33.391
2019-02-16 16:30:00	32.665	40.92	29.439	44.38	30.9	32.872
2019-02-16 17:00:00	32.665	37.893	30.192	40.142	30.672	32.33
2019-02-16 17:30:00	32.587	37.124	30.343	38.868	30.217	31.689
2019-02-16 18:00:00	32.433	37.042	30.268	38.532	29.615	30.976
2019-02-16 18:30:00	31.944	36.012	30.167	36.933	28.791	30.142
2019-02-16 19:00:00	31.484	34.466	29.865	35.315	28.097	29.315
2019-02-16 19:30:00	30.571	32.691	29.29	32.924	27.186	28.171
2019-02-16 20:00:00	29.439	30.066	28.593	30.293	26.353	27.087
2019-02-16 20:30:00	28.171	25.939	27.801	26.622	25.404	25.841
2019-02-16 21:00:00	26.842	24.05	27.014	24.605	24.508	24.581
2019-02-16 21:30:00	25.793	22.8	26.353	23.4	23.713	23.4
2019-02-16 22:00:00	24.75	22.178	25.768	22.705	23.16	22.753
2019-02-16 22:30:00	23.978	20.936	25.38	21.557	22.609	21.819
2019-02-16 23:00:00	23.184	20.293	24.919	20.936	22.369	21.223
2019-02-16 23:30:00	22.609	20.222	24.532	20.841	22.178	20.817
2019-02-17	22.058	19.484	24.122	20.103	21.748	20.388
2019-02-17 00:30:00	21.461	19.008	23.569	19.627	20.746	19.46
2019-02-17 01:00:00	20.722	18.081	23.064	18.699	20.293	18.866
2019-02-17 01:30:00	20.365	17.153	22.944	17.938	20.293	18.105
2019-02-17 02:00:00	20.031	16.749	22.513	17.582	20.15	17.843
2019-02-17 02:30:00	17.225	14.266	22.896	16.344	18.414	15.915
2019-02-17 03:00:00	15.676	12.292	21.843	14.84	17.201	13.762
2019-02-17 03:30:00	14.984	11.686	21.939	14.721	16.963	12.703
2019-02-17 04:00:00	15.796	11.37	21.843	14.601	16.915	12.678
2019-02-17 04:30:00	12.34	10.051	21.199	13.642	15.294	11.492
2019-02-17 05:00:00	11.297	9.139	20.531	12.871	14.936	10.736
2019-02-17 05:30:00	10.785	8.344	19.698	11.953	14.481	9.928
2019-02-17 06:00:00	10.026	7.444	19.294	11.637	14.074	8.866
2019-02-17 06:30:00	9.903	7.318	19.508	11.516	13.858	9.089
2019-02-17 07:00:00	10.369	7.242	19.222	11.589	14.05	9.015
2019-02-17 07:30:00	10.638	7.594	18.58	11.734	14.17	9.558
2019-02-17 08:00:00	14.721	10.663	19.103	12.727	17.034	19.008
2019-02-17 08:30:00	15.605	14.337	19.246	13.786	18.913	26.353
2019-02-17 09:00:00	18.129	17.582	19.46	14.888	20.269	31.561
2019-02-17 09:30:00	17.605	18.58	19.056	16.439	22.178	35.502
2019-02-17 10:00:00	19.365	21.819	19.413	17.368	23.665	39.234
2019-02-17 10:30:00	19.984	23.424	19.603	18.319	26.109	42.06
2019-02-17 11:00:00	21.318	26.28	20.007	19.436	27.382	43.738
2019-02-17 11:30:00	22.705	29.665	20.388	20.365	29.14	46.641
2019-02-17 12:00:00	22.8	28.593	20.96	21.366	30.444	47.941
2019-02-17 12:30:00	23.833	30.318	21.533	22.561	31.281	48.637
2019-02-17 13:00:00	24.75	26.524	22.106	23.497	32.355	46.545
2019-02-17 13:30:00	25.501	25.525	22.681	34.889	32.407	42.953
2019-02-17 14:00:00	26.158	26.012	23.088	38.784	32.073	40.862
2019-02-17 14:30:00	27.063	26.916	24.146	40.717	31.357	38.282
2019-02-17 15:00:00	28.295	39.715	24.895	48.637	29.865	34.176
2019-02-17 15:30:00	29.34	37.838	26.256	42.743	30.268	33.001
2019-02-17 16:00:00	29.765	35.102	27.259	38.087	29.941	31.816
2019-02-17 16:30:00	29.941	34.097	28.097	36.987	29.439	30.95
2019-02-17 17:00:00	29.966	34.413	28.27	36.661	28.891	30.167
2019-02-17 17:30:00	29.29	32.304	28.023	33.992	28.023	29.115
2019-02-17 18:00:00	28.518	31.052	27.628	32.407	27.136	28.122
2019-02-17 18:30:00	27.677	29.865	27.112	30.697	26.207	26.94
2019-02-17 19:00:00	27.136	29.439	26.671	29.89	25.38	25.939
2019-02-17 19:30:00	25.817	27.112	25.744	27.579	24.315	24.702
2019-02-17 20:00:00	24.823	25.258	24.944	25.793	23.376	23.4
2019-02-17 20:30:00	23.376	21.079	23.713	22.058	22.393	21.915
2019-02-17 21:00:00	22.345	20.317	23.256	20.841	21.604	21.032
2019-02-17 21:30:00	21.413	19.674	22.561	20.126	21.008	20.341
2019-02-17 22:00:00	20.555	18.747	21.939	19.199	20.341	19.436
2019-02-17 22:30:00	19.413	17.843	20.936	18.247	19.532	18.747
2019-02-17 23:00:00	18.889	17.225	20.531	17.653	19.127	18.105
2019-02-17 23:30:00	18.319	16.415	20.317	16.868	18.818	17.32
2019-02-18	18.081	15.533	19.936	16.058	19.246	17.058
2019-02-18 00:30:00	17.891	14.361	20.055	15.199	18.747	15.533
2019-02-18 01:00:00	16.963	14.697	18.247	15.175	18.366	16.32
2019-02-18 01:30:00	16.701	13.882	18.2	14.577	17.249	15.485
2019-02-18 02:00:00	16.463	13.04	18.652	13.858	17.368	14.361
2019-02-18 02:30:00	16.511	11.492	19.341	13.522	17.177	13.401
2019-02-18 03:00:00	16.32	11.856	19.318	13.666	16.82	12.896
2019-02-18 03:30:00	15.414	11.127	18.675	12.944	16.32	12.871
2019-02-18 04:00:00	13.209	9.879	18.652	12.171	15.318	11.759
2019-02-18 04:30:00	11.516	8.543	18.343	11.224	14.601	10.222
2019-02-18 05:00:00	11.2	8.17	18.176	11.005	14.409	9.829
2019-02-18 05:30:00	12.727	9.657	17.938	11.977	14.816	11.029
2019-02-18 06:00:00	14.864	14.026	17.153	14.697	15.294	13.016
2019-02-18 06:30:00	14.314	12.799	16.749	13.546	14.505	12.63
2019-02-18 07:00:00	13.738	12.799	15.7	13.185	14.17	12.751
2019-02-18 07:30:00	13.185	12.05	15.247	12.437	14.05	12.413
2019-02-18 08:00:00	12.775	12.243	14.673	12.219	15.414	16.534
2019-02-18 08:30:00	12.944	12.92	14.625	12.413	16.915	20.293
2019-02-18 09:00:00	13.546	14.17	14.864	13.305	18.319	23.112
2019-02-18 09:30:00	14.314	15.318	15.27	14.122	20.126	26.916
2019-02-18 10:00:00	15.27	16.844	15.772	15.223	22.034	29.74
2019-02-18 10:30:00	16.082	18.699	16.296	16.415	24.315	32.51
2019-02-18 11:00:00	16.177	16.654	16.272	16.511	21.485	25.598
2019-02-18 11:30:00	16.368	16.963	16.415	16.868	21.008	23.713
2019-02-18 12:00:00	17.225	18.414	17.106	18.081	22.154	24.992
2019-02-18 12:30:00	17.843	19.413	17.653	18.985	22.896	26.524
2019-02-18 13:00:00	17.938	19.175	17.772	19.318	23.328	26.989
2019-02-18 13:30:00	18.652	19.46	18.366	24.702	24.605	28.369
2019-02-18 14:00:00	18.747	19.651	18.461	23.472	24.002	26.646
2019-02-18 14:30:00	19.103	20.031	18.842	22.944	23.689	25.939
2019-02-18 15:00:00	19.888	24.267	19.389	26.965	23.737	25.016
2019-02-18 15:30:00	19.674	20.936	19.365	22.034	23.328	24.267
2019-02-18 16:00:00	20.126	24.871	19.936	27.456	23.424	24.171
2019-02-18 16:30:00	20.77	26.085	20.531	28.196	22.824	23.352
2019-02-18 17:00:00	19.722	23.545	19.722	25.016	21.318	21.39
2019-02-18 17:30:00	19.532	22.034	19.674	23.28	20.77	20.746
2019-02-18 18:00:00	19.341	21.7	19.722	22.896	20.15	20.103
2019-02-18 18:30:00	19.175	21.652	19.603	22.609	19.555	19.341
2019-02-18 19:00:00	18.652	20.841	19.175	21.223	18.961	18.557
2019-02-18 19:30:00	18.105	19.746	18.794	20.079	18.319	17.748
2019-02-18 20:00:00	17.344	16.915	18.176	17.486	17.986	16.915
2019-02-18 20:30:00	16.201	14.266	17.605	14.864	17.463	15.939
2019-02-18 21:00:00	15.557	13.305	17.296	13.882	16.987	14.96
2019-02-18 21:30:00	14.936	12.316	16.82	12.992	16.725	14.194
2019-02-18 22:00:00	14.745	11.613	17.368	12.799	16.225	13.353
2019-02-18 22:30:00	14.792	10.541	17.296	11.856	15.867	12.098
2019-02-18 23:00:00	13.786	10.296	16.296	11.248	15.509	11.394
2019-02-18 23:30:00	13.57	10.001	16.63	11.005	15.629	11.492
2019-02-19	13.353	9.41	16.272	10.59	14.936	10.516
2019-02-19 00:30:00	13.353	9.312	16.344	10.834	15.199	10.761
2019-02-19 01:00:00	11.492	7.544	16.606	10.051	13.666	9.46
2019-02-19 01:30:00	12.437	7.87	16.034	9.706	13.425	9.015
2019-02-19 02:00:00	12.219	9.312	15.509	10.663	13.618	8.742
2019-02-19 02:30:00	12.364	9.509	15.7	11.248	13.81	9.534
2019-02-19 03:00:00	11.734	8.717	15.915	11.029	13.618	9.879
2019-02-19 03:30:00	11.832	8.916	15.031	10.541	13.257	10.345
2019-02-19 04:00:00	11.029	8.394	14.481	10.075	12.751	10.001
2019-02-19 04:30:00	10.614	7.695	15.127	9.534	12.534	9.41
2019-02-19 05:00:00	10.883	8.07	14.409	9.657	12.389	9.534
2019-02-19 05:30:00	10.198	7.041	14.936	9.139	12.461	8.965
2019-02-19 06:00:00	10.124	6.763	14.792	8.891	12.243	8.419
2019-02-19 06:30:00	9.78	6.535	14.577	8.668	11.783	8.519
2019-02-19 07:00:00	9.139	6.102	14.433	8.195	11.662	7.87
2019-02-19 07:30:00	8.668	5.796	14.17	8.095	11.54	7.469
2019-02-19 08:00:00	11.662	7.594	14.098	8.568	13.81	15.485
2019-02-19 08:30:00	14.721	11.856	14.314	9.854	14.553	18.129
2019-02-19 09:00:00	16.939	14.529	14.146	10.785	15.891	22.417
2019-02-19 09:30:00	15.175	15.079	14.409	12.292	17.915	28.221
2019-02-19 10:00:00	14.625	16.415	14.409	13.064	19.08	31.816
2019-02-19 10:30:00	16.058	18.866	14.864	14.026	20.936	34.624
2019-02-19 11:00:00	16.32	20.103	15.294	15.055	22.944	37.48
2019-02-19 11:30:00	17.106	20.46	16.106	16.463	24.243	37.59
2019-02-19 12:00:00	18.01	21.652	16.773	17.439	25.647	38.588
2019-02-19 12:30:00	18.652	22.178	17.225	18.033	26.378	38.616
2019-02-19 13:00:00	18.842	18.913	17.463	18.2	26.475	36.362
2019-02-19 13:30:00	19.222	18.747	17.748	26.036	26.426	33.861
2019-02-19 14:00:00	19.579	19.103	18.176	27.554	25.477	30.545
2019-02-19 14:30:00	20.126	19.555	18.771	27.554	24.291	28.593
2019-02-19 15:00:00	20.65	24.388	19.27	27.825	23.569	25.793
2019-02-19 15:30:00	20.555	24.363	19.603	27.407	22.753	23.857
2019-02-19 16:00:00	20.913	24.968	20.055	27.604	22.465	23.112
2019-02-19 16:30:00	21.127	24.774	20.412	26.842	21.939	22.513
2019-02-19 17:00:00	20.865	23.833	20.484	25.914	21.413	21.772
2019-02-19 17:30:00	20.698	24.002	20.412	25.671	20.77	21.056
2019-02-19 18:00:00	20.317	23.064	20.198	24.315	20.222	20.388
2019-02-19 18:30:00	19.436	21.437	19.579	22.274	19.365	19.365
2019-02-19 19:00:00	18.794	20.841	19.103	21.223	18.461	18.39
2019-02-19 19:30:00	18.057	19.651	18.509	19.793	17.867	17.463
2019-02-19 20:00:00	17.249	17.962	17.915	17.962	17.153	16.534
2019-02-19 20:30:00	15.939	14.17	16.963	14.792	16.392	15.438
2019-02-19 21:00:00	15.031	13.112	16.463	13.642	15.915	14.385
2019-02-19 21:30:00	14.433	12.485	16.249	13.04	15.461	13.786
2019-02-19 22:00:00	13.762	11.783	15.843	12.292	15.748	13.401
2019-02-19 22:30:00	13.329	11.419	15.509	11.904	15.079	12.823
2019-02-19 23:00:00	13.305	10.761	15.605	11.54	14.601	11.904
2019-02-19 23:30:00	13.209	9.213	16.129	10.932	14.529	10.98
2019-02-20	12.896	9.435	15.581	10.761	14.098	10.736
2019-02-20 00:30:00	12.389	9.015	15.127	10.394	13.69	10.418
2019-02-20 01:00:00	10.663	7.217	15.318	9.386	12.896	9.188
2019-02-20 01:30:00	10.785	7.268	15.247	9.361	12.751	8.941
2019-02-20 02:00:00	9.163	6.484	15.103	8.841	11.953	8.394
2019-02-20 02:30:00	9.262	6.255	14.768	8.693	12.292	8.045
2019-02-20 03:00:00	7.87	5.385	14.553	7.97	11.346	7.368
2019-02-20 03:30:00	7.72	4.973	14.529	7.645	10.956	6.99
2019-02-20 04:00:00	6.914	4.298	14.05	7.116	10.736	6.408
2019-02-20 04:30:00	7.091	4.402	13.834	7.142	10.932	6.382
2019-02-20 05:00:00	8.469	6.179	13.112	7.995	10.98	7.268
2019-02-20 05:30:00	7.494	5.179	13.088	7.469	10.369	6.687
2019-02-20 06:00:00	8.891	6.839	12.871	8.344	10.467	6.763
2019-02-20 06:30:00	9.657	8.941	12.147	9.608	10.394	7.92
2019-02-20 07:00:00	10.247	9.854	12.147	10.222	10.59	8.593
2019-02-20 07:30:00	10.834	10.565	12.34	10.907	11.127	9.534
2019-02-20 08:00:00	10.687	10.541	11.953	10.492	12.703	14.026
2019-02-20 08:30:00	10.834	11.053	11.904	10.492	14.361	19.103
2019-02-20 09:00:00	12.05	13.088	12.703	12.122	16.249	22.298
2019-02-20 09:30:00	12.992	14.098	13.257	12.968	17.677	25.089
2019-02-20 10:00:00	13.786	15.103	13.714	13.594	18.961	27.554
2019-02-20 10:30:00	14.697	16.296	14.29	14.481	21.056	30.192
2019-02-20 11:00:00	15.485	17.796	14.816	15.151	22.321	32.278
2019-02-20 11:30:00	16.201	19.008	15.342	15.867	23.304	33.495
2019-02-20 12:00:00	16.987	19.746	15.986	16.749	23.737	33.6
2019-02-20 12:30:00	17.225	19.389	16.249	16.892	24.339	33.835
2019-02-20 13:00:00	17.582	17.796	16.511	17.415	24.388	31.919
2019-02-20 13:30:00	17.796	17.701	16.749	23.256	23.785	29.315
2019-02-20 14:00:00	18.033	17.986	16.963	24.944	24.195	28.27
2019-02-20 14:30:00	18.628	18.509	17.463	24.871	23.04	26.695
2019-02-20 15:00:00	19.603	23.617	18.176	26.769	22.681	24.677
2019-02-20 15:30:00	20.031	23.665	18.866	26.28	22.513	23.833
2019-02-20 16:00:00	19.984	22.681	19.199	24.968	21.915	22.944
2019-02-20 16:30:00	20.031	23.088	19.341	24.823	21.461	22.25
2019-02-20 17:00:00	20.507	24.484	19.936	26.28	21.318	21.963
2019-02-20 17:30:00	19.817	22.226	19.365	23.256	21.175	21.795
2019-02-20 18:00:00	19.579	22.202	19.222	23.28	20.555	21.223
2019-02-20 18:30:00	18.961	20.484	18.747	20.984	19.841	20.126
2019-02-20 19:00:00	18.414	20.15	18.485	20.627	18.985	19.175
2019-02-20 19:30:00	17.677	17.058	17.891	17.819	18.176	17.986
2019-02-20 20:00:00	16.177	14.601	16.82	14.96	17.106	16.487
2019-02-20 20:30:00	15.39	13.546	16.368	13.954	16.415	15.366
2019-02-20 21:00:00	14.577	12.074	15.414	12.751	16.129	14.194
2019-02-20 21:30:00	14.098	11.443	15.223	12.147	16.272	13.81
2019-02-20 22:00:00	14.29	10.369	15.891	11.419	15.819	12.896
2019-02-20 22:30:00	13.57	11.565	15.079	12.171	14.649	12.558
2019-02-20 23:00:00	13.257	10.858	14.84	11.565	14.625	12.05
2019-02-20 23:30:00	11.467	9.336	14.577	10.834	13.522	11.273
2019-02-21	10.736	7.87	15.366	9.903	13.257	9.903
2019-02-21 00:30:00	9.903	6.864	14.936	9.015	12.727	8.693
2019-02-21 01:00:00	8.817	6.077	14.577	8.668	12.05	7.92
2019-02-21 01:30:00	8.22	5.462	14.481	8.319	11.516	7.494
2019-02-21 02:00:00	7.368	4.818	14.074	7.67	11.053	6.687
2019-02-21 02:30:00	6.94	4.584	13.69	7.343	10.883	6.433
2019-02-21 03:00:00	6.763	3.932	13.473	6.965	10.565	5.872
2019-02-21 03:30:00	5.693	3.617	13.161	6.585	9.903	5.488
2019-02-21 04:00:00	5.411	3.195	13.064	6.23	9.756	5.257
2019-02-21 04:30:00	5.668	3.168	12.654	6.281	9.756	5.154
2019-02-21 05:00:00	5.591	2.93	12.437	6.153	9.854	5.024
2019-02-21 05:30:00	5.411	2.797	12.461	6.153	9.485	4.869
2019-02-21 06:00:00	5.616	2.903	12.195	6	9.336	5.024
2019-02-21 06:30:00	4.844	2.423	11.953	5.693	9.139	4.402
2019-02-21 07:00:00	4.973	2.477	11.807	5.591	9.015	4.428
2019-02-21 07:30:00	5.745	3.301	11.904	6.026	9.114	5.179
2019-02-21 08:00:00	8.319	4.662	11.71	6.712	11.516	12.534
2019-02-21 08:30:00	12.195	8.941	11.856	8.095	12.92	17.13
2019-02-21 09:00:00	14.457	12.05	11.88	9.015	13.738	20.222
2019-02-21 09:30:00	17.106	14.074	12.098	9.977	14.816	23.641
2019-02-21 10:00:00	18.295	17.249	12.171	10.516	15.867	27.407
2019-02-21 10:30:00	14.194	16.915	12.944	13.546	19.555	32.33
2019-02-21 11:00:00	14.409	19.508	13.281	14.194	22.369	35.716
2019-02-21 11:30:00	15.127	19.555	13.786	14.697	22.848	36.905
2019-02-21 12:00:00	16.129	19.508	13.978	15.39	21.056	32.021
2019-02-21 12:30:00	16.463	18.818	14.481	17.653	21.748	28.394
2019-02-21 13:00:00	16.915	19.103	15.39	18.913	22.25	27.481
2019-02-21 13:30:00	17.225	18.747	15.891	22.298	22.992	28.097
2019-02-21 14:00:00	17.629	18.675	15.509	18.509	20.96	22.848
2019-02-21 14:30:00	16.701	16.677	14.984	16.32	18.818	19.46
2019-02-21 15:00:00	16.415	16.32	15.223	16.177	18.937	19.817
2019-02-21 15:30:00	16.463	17.153	15.055	16.892	18.842	19.27
2019-02-21 16:00:00	16.701	17.915	15.461	17.748	20.079	21.27
2019-02-21 16:30:00	16.63	17.344	15.7	17.558	20.388	21.604
2019-02-21 17:00:00	16.463	16.796	15.7	16.939	19.841	21.056
2019-02-21 17:30:00	16.034	15.843	15.294	15.748	18.913	19.984
2019-02-21 18:00:00	14.96	14.409	14.697	14.314	18.033	18.343
2019-02-21 18:30:00	14.122	12.799	14.194	12.896	17.391	17.368
2019-02-21 19:00:00	13.57	12.63	13.834	12.678	16.487	15.915
2019-02-21 19:30:00	13.016	11.273	13.57	11.54	16.106	15.079
2019-02-21 20:00:00	12.534	9.485	12.847	9.731	14.433	12.534
2019-02-21 20:30:00	11.759	9.114	12.437	9.805	13.834	11.151
2019-02-21 21:00:00	11.686	9.558	12.34	10.443	13.185	10.247
2019-02-21 21:30:00	11.492	9.213	12.219	9.928	13.257	10.247
2019-02-21 22:00:00	10.736	7.92	12.847	8.717	12.944	10.149
2019-02-21 22:30:00	10.443	7.167	12.823	8.145	12.871	9.509
2019-02-21 23:00:00	10.394	7.895	12.364	8.668	12.871	10.051
2019-02-21 23:30:00	10.565	7.87	12.775	8.941	13.137	10.247
2019-02-22	10.198	8.095	12.799	9.139	12.703	10.296
2019-02-22 00:30:00	11.102	8.369	12.678	9.608	13.401	10.638
2019-02-22 01:00:00	11.175	8.593	12.751	9.829	13.473	10.834
2019-02-22 01:30:00	11.248	8.866	12.558	10.026	13.546	10.98
2019-02-22 02:00:00	11.175	9.04	12.703	10.149	13.305	11.005
2019-02-22 02:30:00	10.638	9.386	12.05	10.345	12.485	10.956
2019-02-22 03:00:00	10.736	9.336	12.316	10.32	12.775	10.932
2019-02-22 03:30:00	10.492	9.41	12.195	10.345	12.413	10.785
2019-02-22 04:00:00	10.418	9.46	11.807	10.394	12.243	10.81
2019-02-22 04:30:00	10.638	9.361	12.461	10.345	12.871	10.81
2019-02-22 05:00:00	10.785	9.163	12.485	10.32	12.968	10.712
2019-02-22 05:30:00	10.883	9.188	12.485	10.222	12.944	10.712
2019-02-22 06:00:00	10.051	9.163	11.419	10.075	11.71	10.369
2019-02-22 06:30:00	10.149	8.444	12.122	9.583	12.171	9.854
2019-02-22 07:00:00	9.829	8.916	11.904	9.903	11.759	10.026
2019-02-22 07:30:00	10.345	8.817	12.122	9.805	11.856	9.903
2019-02-22 08:00:00	10.467	9.312	12.195	10.271	12.389	10.32
2019-02-22 08:30:00	10.761	10.051	12.364	10.858	13.209	11.224
2019-02-22 09:00:00	10.883	10.59	12.268	11.175	12.92	11.929
2019-02-22 09:30:00	11.175	11.467	12.413	12.001	13.401	12.534
2019-02-22 10:00:00	11.273	10.956	12.292	11.662	12.968	12.025
2019-02-22 10:30:00	11.637	12.678	12.485	12.775	14.29	13.738
2019-02-22 11:00:00	12.147	13.738	12.678	13.642	15.223	15.891
2019-02-22 11:30:00	12.05	12.871	12.606	13.281	14.84	15.127
2019-02-22 12:00:00	12.413	14.337	12.775	14.337	15.605	16.534
2019-02-22 12:30:00	12.654	15.366	12.944	15.366	16.225	17.558
2019-02-22 13:00:00	13.016	14.96	13.281	14.984	16.487	17.463
2019-02-22 13:30:00	13.497	15.318	13.546	15.27	16.654	17.463
2019-02-22 14:00:00	14.05	15.605	13.954	15.7	16.749	17.368
2019-02-22 14:30:00	14.29	15.438	14.146	15.557	16.582	17.082
2019-02-22 15:00:00	14.553	15.986	14.361	15.986	17.225	17.819
2019-02-22 15:30:00	14.792	16.272	14.649	16.344	17.819	18.509
2019-02-22 16:00:00	15.008	16.749	14.768	16.844	18.2	19.127
2019-02-22 16:30:00	14.96	15.939	14.697	15.915	17.701	18.533
2019-02-22 17:00:00	15.031	16.034	14.792	16.177	17.701	18.485
2019-02-22 17:30:00	15.008	15.748	14.792	15.867	17.225	17.796
2019-02-22 18:00:00	14.984	15.509	14.745	15.533	17.011	17.391
2019-02-22 18:30:00	14.888	15.199	14.697	15.294	16.701	16.892
2019-02-22 19:00:00	14.601	14.553	14.457	14.553	16.082	16.058
2019-02-22 19:30:00	14.529	14.84	14.505	15.079	15.27	14.984
2019-02-22 20:00:00	14.122	13.305	14.098	13.522	14.601	14.002
2019-02-22 20:30:00	13.497	12.34	13.618	12.437	13.954	13.088
2019-02-22 21:00:00	12.968	11.856	13.329	12.001	13.449	12.34
2019-02-22 21:30:00	12.606	11.419	13.064	11.613	13.088	11.759
2019-02-22 22:00:00	12.292	10.541	12.799	10.834	12.654	10.98
2019-02-22 22:30:00	11.54	9.534	12.485	9.879	12.292	10.051
2019-02-22 23:00:00	11.078	9.213	12.147	9.558	11.88	9.41
2019-02-22 23:30:00	10.736	8.469	12.05	8.99	11.565	8.593
2019-02-23	9.952	7.619	11.443	7.995	11.273	7.995
2019-02-23 00:30:00	9.756	7.368	11.467	7.87	11.175	7.217
2019-02-23 01:00:00	9.386	7.217	11.2	7.72	10.81	6.813
2019-02-23 01:30:00	9.509	6.255	11.589	7.419	10.663	6.204
2019-02-23 02:00:00	9.312	5.642	11.686	6.813	10.541	5.924
2019-02-23 02:30:00	8.668	4.714	11.321	6.153	10.173	6.204
2019-02-23 03:00:00	8.965	5.693	11.127	6.864	9.928	5.745
2019-02-23 03:30:00	8.792	4.869	11.321	6.306	9.903	5.257
2019-02-23 04:00:00	7.293	3.617	11.078	5.334	9.188	5.128
2019-02-23 04:30:00	6.255	2.637	10.687	4.558	8.593	3.827
2019-02-23 05:00:00	5.179	2.423	10.296	4.324	7.97	3.722
2019-02-23 05:30:00	7.015	5.205	9.41	5.975	8.02	4.194
2019-02-23 06:00:00	6.839	5.024	9.213	5.796	8.17	4.35
2019-02-23 06:30:00	6.687	4.376	9.312	5.36	8.145	3.722
2019-02-23 07:00:00	6.509	3.459	9.509	4.869	8.02	3.116
2019-02-23 07:30:00	6.357	2.744	9.608	4.324	8.145	3.248
2019-02-23 08:00:00	6.914	4.246	9.361	4.714	10.296	11.54
2019-02-23 08:30:00	7.318	7.066	9.015	6	11.419	16.63
2019-02-23 09:00:00	8.02	8.965	9.262	7.015	13.161	22.226
2019-02-23 09:30:00	9.682	10.638	9.336	7.77	13.882	24.605
2019-02-23 10:00:00	9.682	11.589	9.756	8.866	15.843	28.642
2019-02-23 10:30:00	10.565	12.92	10.198	9.952	17.272	30.495
2019-02-23 11:00:00	11.565	14.026	10.883	11.102	19.246	29.941
2019-02-23 11:30:00	11.783	14.361	10.956	10.98	19.841	30.52
2019-02-23 12:00:00	11.977	14.912	11.029	11.102	20.365	31.306
2019-02-23 12:30:00	12.292	14.457	11.37	11.516	20.746	31.128
2019-02-23 13:00:00	12.678	12.364	11.613	11.953	20.674	29.59
2019-02-23 13:30:00	12.823	12.243	11.759	17.51	20.603	26.867
2019-02-23 14:00:00	13.209	12.582	12.074	21.7	20.365	24.968
2019-02-23 14:30:00	13.69	13.04	12.606	22.824	18.771	22.753
2019-02-23 15:00:00	13.738	16.987	12.63	20.96	17.701	19.199
2019-02-23 15:30:00	14.17	18.129	13.112	21.604	17.034	17.772
2019-02-23 16:00:00	14.385	19.008	13.738	22.202	16.749	17.082
2019-02-23 16:30:00	14.601	18.438	14.026	20.984	16.082	16.225
2019-02-23 17:00:00	14.649	19.127	14.29	22.011	15.676	15.652
2019-02-23 17:30:00	14.074	17.344	14.026	19.27	14.888	14.792
2019-02-23 18:00:00	13.738	17.177	13.882	18.604	14.29	14.05
2019-02-23 18:30:00	13.137	16.177	13.497	17.13	13.738	13.257
2019-02-23 19:00:00	12.485	14.745	13.016	15.127	12.775	12.195
2019-02-23 19:30:00	11.419	12.63	12.219	13.257	11.856	11.151
2019-02-23 20:00:00	10.443	10.932	11.394	11.273	11.029	10.198
2019-02-23 20:30:00	9.361	7.82	10.638	8.27	10.492	9.238
2019-02-23 21:00:00	8.593	7.167	10.198	7.569	9.829	8.568
2019-02-23 21:30:00	8.145	6.864	9.854	7.268	9.854	8.045
2019-02-23 22:00:00	7.77	6.56	9.608	6.94	9.435	7.594
2019-02-23 22:30:00	7.318	6.051	9.238	6.408	8.99	7.041
2019-02-23 23:00:00	7.015	5.693	8.99	6.102	8.394	6.611
2019-02-23 23:30:00	6.661	5.179	8.767	5.642	8.99	6.281
2019-02-24	6.331	4.089	8.742	4.688	8.817	5.076
2019-02-24 00:30:00	6.306	3.274	9.114	4.246	8.841	4.194
2019-02-24 01:00:00	5.565	2.557	8.319	3.433	8.22	3.591
2019-02-24 01:30:00	5.591	3.433	8.22	4.194	8.519	4.298
2019-02-24 02:00:00	5.231	3.512	7.82	4.115	7.419	3.985
2019-02-24 02:30:00	4.947	3.009	7.569	3.696	7.318	3.722
2019-02-24 03:00:00	4.688	2.637	7.419	3.301	7.444	3.406
2019-02-24 03:30:00	4.402	2.664	6.864	3.142	7.87	3.696
2019-02-24 04:00:00	4.35	1.751	7.242	2.584	7.268	2.93
2019-02-24 04:30:00	4.246	0.88	7.519	2.074	7.015	2.61
2019-02-24 05:00:00	3.67	0.962	6.94	2.021	6.102	2.77
2019-02-24 05:30:00	3.775	0.439	7.192	1.751	6.408	2.128
2019-02-24 06:00:00	3.696	0.412	6.914	1.534	6.408	1.561
2019-02-24 06:30:00	3.301	0.66	6.408	1.48	6.357	1.453
2019-02-24 07:00:00	2.956	0.495	6.051	1.235	5.898	1.099
2019-02-24 07:30:00	2.823	-0.088	6.077	1.044	5.821	1.017
2019-02-24 08:00:00	3.38	0.989	6.204	1.344	8.02	8.419
2019-02-24 08:30:00	4.792	3.485	6.306	2.021	9.04	13.954
2019-02-24 09:00:00	4.895	4.792	5.847	2.823	10.1	18.366
2019-02-24 09:30:00	5.514	6.102	6.051	3.775	11.005	20.722
2019-02-24 10:00:00	5.591	6.914	6.204	4.818	13.112	23.232
2019-02-24 10:30:00	6.56	8.99	6.636	5.693	14.002	25.89
2019-02-24 11:00:00	7.343	10.541	6.99	6.585	15.509	26.769
2019-02-24 11:30:00	9.114	14.17	7.469	7.142	16.01	29.941
2019-02-24 12:00:00	12.05	18.771	7.995	8.12	16.129	29.865
2019-02-24 12:30:00	12.534	18.771	8.295	8.693	16.034	29.04
2019-02-24 13:00:00	12.485	12.243	8.618	9.41	16.201	26.598
2019-02-24 13:30:00	12.992	12.001	8.965	18.247	16.582	24.146
2019-02-24 14:00:00	12.534	12.001	9.78	26.036	17.177	23.184
2019-02-24 14:30:00	13.618	12.678	10.932	32.562	15.605	19.698
2019-02-24 15:00:00	14.218	23.761	11.734	31.153	16.177	18.224
2019-02-24 15:30:00	14.792	25.089	12.34	32.433	15.748	17.106
2019-02-24 16:00:00	15.247	26.378	12.92	31.306	15.629	16.392
2019-02-24 16:30:00	15.676	22.25	13.546	26.085	15.557	16.177
2019-02-24 17:00:00	15.318	19.698	13.57	22.561	15.008	15.438
2019-02-24 17:30:00	14.553	18.271	13.449	20.126	14.337	14.673
2019-02-24 18:00:00	14.553	18.343	13.522	20.269	14.05	14.146
2019-02-24 18:30:00	14.026	17.368	13.473	18.652	13.546	13.473
2019-02-24 19:00:00	13.522	16.558	13.209	17.034	12.847	12.678
2019-02-24 19:30:00	12.968	15.031	12.871	15.509	12.122	11.734
2019-02-24 20:00:00	12.437	13.473	12.558	13.834	11.783	10.883
2019-02-24 20:30:00	11.37	9.04	12.001	9.854	11.613	10.026
2019-02-24 21:00:00	11.127	7.72	12.001	8.693	11.224	9.238
2019-02-24 21:30:00	9.287	6.813	11.929	8.369	9.903	8.17
2019-02-24 22:00:00	10.247	6.153	11.807	7.519	10.467	7.544
2019-02-24 22:30:00	9.78	5.591	11.029	6.914	9.952	7.419
2019-02-24 23:00:00	9.509	4.921	11.419	6.382	9.977	6.331
2019-02-24 23:30:00	8.99	4.61	11.127	5.949	9.805	6.281
2019-02-25	8.618	4.714	10.98	6	9.509	6.153
2019-02-25 00:30:00	7.97	5.024	11.127	7.192	9.312	6.458
2019-02-25 01:00:00	6.965	3.67	11.005	6.051	8.394	5.462
2019-02-25 01:30:00	6.026	2.37	10.32	4.714	7.67	4.298
2019-02-25 02:00:00	5.745	2.717	10.149	5.154	7.92	4.272
2019-02-25 02:30:00	6.306	2.85	10.173	5.282	7.895	4.168
2019-02-25 03:00:00	4.818	1.507	9.903	4.324	7.293	3.591
2019-02-25 03:30:00	5.949	0.687	9.534	3.195	6.889	2.37
2019-02-25 04:00:00	3.564	-0.116	9.213	2.903	6.077	1.832
2019-02-25 04:30:00	2.664	-1.015	8.866	2.316	5.539	0.77
2019-02-25 05:00:00	1.126	-1.727	8.27	1.724	5.231	-0.088
2019-02-25 05:30:00	-0.004	-2.596	7.544	0.962	4.636	-0.958
2019-02-25 06:00:00	-1.185	-2.888	7.318	0.273	3.327	-1.27
2019-02-25 06:30:00	-1.413	-3.657	6.864	-0.171	3.591	-1.871
2019-02-25 07:00:00	-1.584	-4.046	6.535	-0.339	3.406	-2.392
2019-02-25 07:30:00	-2.537	-4.197	6.382	-0.62	2.503	-2.508
2019-02-25 08:00:00	0.384	-2.625	6	-0.227	4.766	4.115
2019-02-25 08:30:00	4.921	1.507	6.204	1.071	6.914	11.394
2019-02-25 09:00:00	6.408	5.796	6.509	2.664	8.817	17.32
2019-02-25 09:30:00	8.145	7.845	6.661	4.037	10.198	19.413
2019-02-25 10:00:00	11.029	10.59	6.914	4.766	10.81	21.342
2019-02-25 10:30:00	9.213	11.2	7.242	5.949	12.437	23.569
2019-02-25 11:00:00	8.618	13.209	7.544	6.813	14.457	28.965
2019-02-25 11:30:00	8.866	14.314	7.87	7.444	16.153	31.153
2019-02-25 12:00:00	9.558	14.864	8.369	8.444	16.773	33.521
2019-02-25 12:30:00	10.663	16.654	8.717	9.188	18.366	34.413
2019-02-25 13:00:00	14.098	13.329	9.089	10.051	17.034	27.776
2019-02-25 13:30:00	15.031	13.112	9.312	18.485	16.01	24.291
2019-02-25 14:00:00	13.93	13.016	10.247	30.722	16.844	23.521
2019-02-25 14:30:00	14.17	13.738	11.565	28.667	17.32	23.016
2019-02-25 15:00:00	14.984	24.484	12.437	32.021	16.749	19.484
2019-02-25 15:30:00	15.915	22.585	13.473	27.235	17.272	19.175
2019-02-25 16:00:00	16.32	28.221	14.002	33.053	16.749	18.081
2019-02-25 16:30:00	17.605	24.702	15.199	28.692	17.106	18.152
2019-02-25 17:00:00	17.819	26.158	15.7	28.742	16.82	17.724
2019-02-25 17:30:00	18.081	29.065	16.106	32.433	16.749	17.486
2019-02-25 18:00:00	18.604	24.677	16.82	26.989	16.487	17.201
2019-02-25 18:30:00	18.533	25.04	16.892	26.109	16.034	16.725
2019-02-25 19:00:00	18.319	22.92	17.034	24.388	15.533	16.129
2019-02-25 19:30:00	18.224	23.328	16.939	24.557	14.984	15.39
2019-02-25 20:00:00	17.915	20.341	16.701	21.032	14.577	14.673
2019-02-25 20:30:00	17.082	14.649	16.225	15.843	13.978	13.594
2019-02-25 21:00:00	16.296	13.112	16.034	13.93	13.57	12.823
2019-02-25 21:30:00	15.533	12.122	15.557	12.944	12.944	11.637
2019-02-25 22:00:00	14.984	11.467	15.27	12.485	12.509	10.907
2019-02-25 22:30:00	14.457	10.687	15.127	11.759	12.485	10.467
2019-02-25 23:00:00	13.834	10.051	14.649	11.102	12.122	9.854
2019-02-25 23:30:00	13.401	9.756	14.266	10.785	12.025	10.198
2019-02-26	13.016	9.238	13.353	10.296	11.37	9.928
2019-02-26 00:30:00	10.81	7.192	13.93	9.485	10.198	7.519
2019-02-26 01:00:00	11.151	6.357	13.834	9.188	9.854	6.636
2019-02-26 01:30:00	8.742	5.591	13.353	8.668	9.386	6.026
2019-02-26 02:00:00	7.343	4.766	13.016	7.895	8.792	5.385
2019-02-26 02:30:00	6.306	3.854	12.582	7.519	8.369	4.506
2019-02-26 03:00:00	5.154	3.221	12.413	6.94	7.82	4.089
2019-02-26 03:30:00	4.584	2.557	11.977	6.255	7.469	3.433
2019-02-26 04:00:00	3.88	2.021	11.467	5.668	7.066	3.009
2019-02-26 04:30:00	4.194	1.859	11.005	5.36	7.444	3.089
2019-02-26 05:00:00	3.512	1.044	10.761	5.154	6.965	2.396
2019-02-26 05:30:00	2.903	0.852	10.222	4.428	6.408	2.074
2019-02-26 06:00:00	2.37	0.329	10.247	4.324	6.179	1.805
2019-02-26 06:30:00	2.182	-0.004	9.608	3.958	6.026	1.48
2019-02-26 07:00:00	1.751	-0.06	9.386	3.485	5.616	1.371
2019-02-26 07:30:00	1.344	-0.563	8.916	3.406	5.488	0.962
2019-02-26 08:00:00	3.749	1.126	9.04	3.88	7.015	6.914
2019-02-26 08:30:00	7.895	5.591	9.41	5.36	9.188	14.721
2019-02-26 09:00:00	7.97	8.717	9.805	7.242	10.956	20.222
2019-02-26 09:30:00	9.706	11.175	10.051	8.394	12.727	24.412
2019-02-26 10:00:00	14.122	15.318	10.149	9.015	14.29	28.99
2019-02-26 10:30:00	17.986	19.032	10.369	10.296	15.27	29.54
2019-02-26 11:00:00	12.944	17.819	11.419	12.147	19.222	35.235
2019-02-26 11:30:00	13.858	20.055	11.953	12.92	20.15	37.069
2019-02-26 12:00:00	14.529	19.627	12.727	14.074	21.915	38.84
2019-02-26 12:30:00	15.629	20.889	13.064	14.888	22.896	39.601
2019-02-26 13:00:00	20.627	19.222	12.775	15.079	20.555	34.334
2019-02-26 13:30:00	18.366	18.081	13.546	20.222	22.8	34.124
2019-02-26 14:00:00	18.152	18.747	15.008	28.642	24.363	32.717
2019-02-26 14:30:00	19.032	19.103	16.082	31.586	22.657	29.665
2019-02-26 15:00:00	20.246	30.672	16.606	36.552	22.154	26.378
2019-02-26 15:30:00	21.199	35.182	16.963	42.863	21.7	25.113
2019-02-26 16:00:00	21.7	35.743	17.819	42.654	21.461	24.171
2019-02-26 16:30:00	22.489	32.484	19.008	38.476	21.223	23.424
2019-02-26 17:00:00	23.04	31.74	19.627	36.092	21.103	22.968
2019-02-26 17:30:00	22.657	33.469	19.746	37.343	20.841	22.657
2019-02-26 18:00:00	23.232	33.417	20.412	36.173	20.698	22.345
2019-02-26 18:30:00	23.617	28.99	20.984	30.976	20.198	21.628
2019-02-26 19:00:00	23.448	29.615	21.079	31.561	19.555	20.841
2019-02-26 19:30:00	23.088	27.727	20.936	29.64	18.961	20.055
2019-02-26 20:00:00	22.513	24.171	20.603	26.256	18.271	19.032
2019-02-26 20:30:00	21.581	18.509	20.007	20.246	17.51	17.891
2019-02-26 21:00:00	20.46	16.82	19.674	18.2	16.844	17.034
2019-02-26 21:30:00	20.007	15.605	19.008	17.13	16.225	15.39
2019-02-26 22:00:00	19.127	15.031	18.699	16.153	15.748	14.649
2019-02-26 22:30:00	18.747	14.385	18.652	15.891	15.438	14.194
2019-02-26 23:00:00	18.081	13.69	18.247	15.151	14.768	13.497
2019-02-26 23:30:00	17.605	12.074	18.271	14.816	14.577	12.63
2019-02-27	17.296	11.759	17.986	13.618	14.266	11.904
2019-02-27 00:30:00	16.892	10.687	17.701	13.016	13.594	10.883
2019-02-27 01:00:00	13.954	10.124	17.082	12.437	13.04	10.858
2019-02-27 01:30:00	15.175	10.687	16.487	12.437	13.064	10.834
2019-02-27 02:00:00	11.613	8.891	16.701	11.71	11.977	10.001
2019-02-27 02:30:00	11.662	8.717	16.225	11.175	11.71	9.632
2019-02-27 03:00:00	9.534	6.433	15.103	9.78	10.638	7.469
2019-02-27 03:30:00	8.12	5.565	15.103	9.361	10.1	6.661
2019-02-27 04:00:00	8.12	4.973	14.553	8.717	9.977	6.051
2019-02-27 04:30:00	7.343	4.584	14.433	8.419	9.558	5.847
2019-02-27 05:00:00	6.535	3.775	13.978	7.945	8.965	5.05
2019-02-27 05:30:00	6.408	3.248	13.257	7.419	9.015	4.714
2019-02-27 06:00:00	5.257	2.664	12.968	6.99	8.444	4.089
2019-02-27 06:30:00	5.05	2.316	12.268	6.458	8.12	3.67
2019-02-27 07:00:00	4.636	1.751	11.977	5.975	7.995	3.327
2019-02-27 07:30:00	4.22	1.751	12.001	5.949	7.645	3.116
2019-02-27 08:00:00	6.889	4.714	11.734	6.433	9.238	9.928
2019-02-27 08:30:00	11.175	11.686	11.807	7.92	11.589	18.723
2019-02-27 09:00:00	11.759	14.601	12.678	10.075	13.546	23.4
2019-02-27 09:30:00	11.856	15.843	13.112	11.88	15.772	28.518
2019-02-27 10:00:00	13.642	18.842	13.257	12.389	17.225	31.816
2019-02-27 10:30:00	14.098	19.698	13.594	13.546	19.103	35.529
2019-02-27 11:00:00	21.628	26.426	13.546	14.457	18.794	32.691
2019-02-27 11:30:00	23.232	28.99	13.882	15.031	20.007	35.395
2019-02-27 12:00:00	22.226	31.357	14.122	15.652	20.817	35.85
2019-02-27 12:30:00	23.088	29.365	14.337	16.106	21.628	37.508
2019-02-27 13:00:00	22.226	20.555	15.247	17.558	23.328	34.651
2019-02-27 13:30:00	23.665	21.604	15.079	22.154	22.178	32.227
2019-02-27 14:00:00	22.393	21.604	16.296	36.769	23.857	31.612
2019-02-27 14:30:00	22.657	23.328	17.415	39.318	23.256	30.142
2019-02-27 15:00:00	22.776	32.898	18.366	38.672	24.026	27.974
2019-02-27 15:30:00	23.593	34.413	19.555	40.114	23.713	26.72
2019-02-27 16:00:00	24.243	32.51	20.555	35.85	23.713	26.231
2019-02-27 16:30:00	24.074	28.196	20.841	29.215	23.881	26.695
2019-02-27 17:00:00	24.653	36.362	21.581	40.343	24.219	26.842
2019-02-27 17:30:00	24.823	29.414	21.557	30.9	23.328	25.866
2019-02-27 18:00:00	24.847	31.765	21.867	33.027	23.28	25.501
2019-02-27 18:30:00	24.968	30.722	22.274	32.639	22.178	23.93
2019-02-27 19:00:00	24.508	24.968	21.7	25.768	21.533	23.064
2019-02-27 19:30:00	23.713	22.585	21.223	23.088	20.96	22.369
2019-02-27 20:00:00	23.088	21.246	20.889	21.7	20.317	21.461
2019-02-27 20:30:00	22.561	20.603	20.984	21.604	19.888	20.746
2019-02-27 21:00:00	21.843	19.698	20.913	21.27	19.318	19.722
2019-02-27 21:30:00	19.698	17.938	20.674	19.817	18.224	18.247
2019-02-27 22:00:00	17.891	15.891	20.365	18.033	17.082	16.415
2019-02-27 22:30:00	16.868	14.768	20.079	17.011	16.463	15.27
2019-02-27 23:00:00	14.816	12.727	19.318	15.533	15.223	13.209
2019-02-27 23:30:00	13.81	12.05	18.747	14.649	14.84	12.437
2019-02-28	12.558	11.297	18.675	14.457	14.218	11.977
2019-02-28 00:30:00	12.703	10.834	18.438	13.666	14.29	12.074
2019-02-28 01:00:00	11.88	9.435	17.867	12.944	13.594	10.565
2019-02-28 01:30:00	11.321	9.114	17.605	12.582	13.209	10.051
2019-02-28 02:00:00	11.029	8.469	17.534	11.953	12.751	9.558
2019-02-28 02:30:00	9.805	7.268	16.701	11.175	12.147	8.668
2019-02-28 03:00:00	9.386	6.839	16.558	10.541	11.759	7.795
2019-02-28 03:30:00	10.026	6.914	16.153	10.638	11.977	8.469
2019-02-28 04:00:00	9.657	6.813	15.939	10.32	11.565	8.245
2019-02-28 04:30:00	9.435	6.458	15.676	10.051	11.419	8.045
2019-02-28 05:00:00	10.124	6.331	15.629	9.952	11.467	7.745
2019-02-28 05:30:00	10.516	5.898	15.509	9.41	11.224	7.268
2019-02-28 06:00:00	8.965	5.539	15.175	9.089	10.907	7.444
2019-02-28 06:30:00	8.841	5.282	14.745	8.817	10.81	7.066
2019-02-28 07:00:00	8.817	5.385	14.361	8.643	10.345	6.712
2019-02-28 07:30:00	7.494	4.506	13.738	7.845	10.149	6.306
2019-02-28 08:00:00	9.064	6.56	13.522	7.795	11.224	11.734
2019-02-28 08:30:00	12.968	12.582	13.906	9.435	13.209	19.341
2019-02-28 09:00:00	15.27	15.366	13.93	10.883	15.008	23.881
2019-02-28 09:30:00	13.425	15.748	14.361	12.799	17.011	27.653
2019-02-28 10:00:00	14.026	17.439	14.361	13.281	18.152	30.925
2019-02-28 10:30:00	17.891	20.555	14.745	16.225	19.199	29.414
2019-02-28 11:00:00	18.675	24.581	15.055	18.152	21.079	31.357
2019-02-28 11:30:00	17.558	22.13	15.7	19.175	22.178	30.293
2019-02-28 12:00:00	18.224	22.92	15.939	19.936	22.513	30.646
2019-02-28 12:30:00	18.295	22.178	16.344	20.555	23.112	30.091
2019-02-28 13:00:00	18.818	22.657	16.677	21.461	23.232	29.34
2019-02-28 13:30:00	19.341	23.088	17.439	22.393	24.508	30.545
2019-02-28 14:00:00	19.888	22.561	17.701	21.772	24.026	29.19
2019-02-28 14:30:00	20.269	23.978	17.605	22.896	23.136	27.751
2019-02-28 15:00:00	20.246	23.208	17.915	22.369	23.016	27.014
2019-02-28 15:30:00	20.126	21.581	17.938	21.079	22.585	25.939
2019-02-28 16:00:00	19.389	19.603	17.962	19.222	21.39	23.448
2019-02-28 16:30:00	18.557	18.366	17.558	18.224	20.365	21.676
2019-02-28 17:00:00	18.343	18.319	17.534	18.319	20.222	21.461
2019-02-28 17:30:00	18.247	18.105	17.51	18.271	19.318	20.126
2019-02-28 18:00:00	17.986	17.558	17.463	17.748	18.699	19.246
2019-02-28 18:30:00	17.51	17.177	17.177	17.225	18.438	18.747
2019-02-28 19:00:00	17.082	17.153	16.892	17.177	17.891	18.105
2019-02-28 19:30:00	16.701	17.486	16.654	17.153	17.368	17.463
2019-02-28 20:00:00	16.034	15.079	16.129	15.318	16.749	16.654
2019-02-28 20:30:00	15.461	14.505	15.796	14.649	16.368	16.01
2019-02-28 21:00:00	14.984	14.074	15.414	14.266	15.748	15.438
2019-02-28 21:30:00	14.314	13.305	14.864	13.449	14.936	14.409
2019-02-28 22:00:00	13.618	12.437	14.361	12.606	14.337	13.666
2019-02-28 22:30:00	13.04	11.856	13.882	12.05	13.738	12.92
2019-02-28 23:00:00	12.606	11.273	13.546	11.54	13.425	12.268
2019-02-28 23:30:00	12.219	10.736	13.088	11.029	12.992	11.613
2019-03-01	11.856	10.247	12.847	10.541	12.703	11.2
2019-03-01 00:30:00	11.613	9.879	12.751	10.32	12.63	10.687
2019-03-01 01:00:00	11.37	8.99	12.847	9.583	12.534	9.78
2019-03-01 01:30:00	11.029	9.064	12.654	9.657	12.195	9.632
2019-03-01 02:00:00	10.663	9.163	12.292	9.558	11.904	9.485
2019-03-01 02:30:00	10.443	8.717	12.001	9.213	11.856	9.361
2019-03-01 03:00:00	10.369	8.195	12.195	8.916	11.613	8.841
2019-03-01 03:30:00	10.345	8.717	12.437	9.583	12.147	9.731
2019-03-01 04:00:00	10.565	9.879	11.953	10.247	11.783	10.149
2019-03-01 04:30:00	10.59	10.198	11.856	10.443	11.613	10.173
2019-03-01 05:00:00	10.638	10.222	11.783	10.516	11.807	10.687
2019-03-01 05:30:00	11.053	10.932	11.929	11.151	12.098	11.2
2019-03-01 06:00:00	10.834	10.443	11.759	10.712	12.001	11.151
2019-03-01 06:30:00	10.443	8.866	11.175	9.336	11.37	10.149
2019-03-01 07:00:00	10.198	9.163	11.419	9.213	11.759	10.001
2019-03-01 07:30:00	9.78	8.792	11.078	9.015	11.662	9.952
2019-03-01 08:00:00	9.41	8.419	10.687	8.593	11.516	9.952
2019-03-01 08:30:00	9.952	10.247	10.956	9.879	13.137	15.867
2019-03-01 09:00:00	10.369	11.029	11.078	10.296	14.242	18.366
2019-03-01 09:30:00	10.785	12.509	11.2	11.248	15.986	21.485
2019-03-01 10:00:00	10.932	12.001	11.151	10.59	16.106	22.776
2019-03-01 10:30:00	11.248	12.534	11.273	10.932	16.939	24.46
2019-03-01 11:00:00	11.37	13.064	11.273	10.834	17.986	25.841
2019-03-01 11:30:00	11.443	13.497	11.248	11.005	18.889	27.358
2019-03-01 12:00:00	11.613	13.642	11.37	11.492	19.246	27.235
2019-03-01 12:30:00	12.34	13.401	11.832	11.807	20.46	29.74
2019-03-01 13:00:00	12.799	12.292	11.977	11.953	19.746	27.949
2019-03-01 13:30:00	13.353	12.823	12.485	13.305	20.436	26.989
2019-03-01 14:00:00	13.618	12.968	12.823	22.753	19.603	24.702
2019-03-01 14:30:00	14.96	14.409	13.834	27.998	18.985	23.569
2019-03-01 15:00:00	15.915	24.436	14.361	30.016	18.699	21.056
2019-03-01 15:30:00	16.558	24.267	14.984	29.215	18.319	19.793
2019-03-01 16:00:00	16.892	25.89	15.557	30.773	17.938	18.889
2019-03-01 16:30:00	17.724	26.769	16.296	30.748	17.819	18.295
2019-03-01 17:00:00	18.081	26.573	16.654	30.117	17.463	17.938
2019-03-01 17:30:00	17.915	27.186	16.63	29.966	16.796	17.082
2019-03-01 18:00:00	17.605	26.085	16.844	29.991	16.368	16.463
2019-03-01 18:30:00	17.629	22.178	16.749	23.593	16.034	16.058
2019-03-01 19:00:00	16.915	19.912	16.368	20.96	15.438	15.318
2019-03-01 19:30:00	15.867	17.201	15.652	17.724	14.577	14.218
2019-03-01 20:00:00	14.601	14.337	14.96	15.008	13.834	13.161
2019-03-01 20:30:00	13.546	10.761	14.242	11.662	13.377	11.953
2019-03-01 21:00:00	12.775	9.805	13.978	10.687	12.944	11.053
2019-03-01 21:30:00	12.147	9.312	13.81	10.051	12.992	10.492
2019-03-01 22:00:00	11.856	8.717	13.714	9.657	12.606	9.977
2019-03-01 22:30:00	11.516	7.82	13.401	8.941	11.904	8.742
2019-03-01 23:00:00	10.932	6.864	13.04	7.87	11.565	7.92
2019-03-01 23:30:00	10.785	6.636	13.161	8.22	11.394	7.645
2019-03-02	9.879	5.949	12.292	7.116	10.932	6.813
2019-03-02 00:30:00	9.952	5.591	12.582	7.167	10.712	6.484
2019-03-02 01:00:00	9.657	5.154	12.316	6.788	10.345	6.153
2019-03-02 01:30:00	9.485	3.985	12.654	6.611	10.001	5.616
2019-03-02 02:00:00	7.167	3.564	12.606	6.509	9.238	5.437
2019-03-02 02:30:00	7.87	3.195	12.34	6.255	9.213	4.921
2019-03-02 03:00:00	8.494	3.617	12.098	6.23	9.064	4.61
2019-03-02 03:30:00	8.369	3.67	11.662	5.975	8.817	4.063
2019-03-02 04:00:00	6.712	2.637	11.71	5.462	8.618	4.35
2019-03-02 04:30:00	7.519	3.036	10.932	4.844	8.344	3.67
2019-03-02 05:00:00	5.77	2.182	10.785	4.35	7.82	3.248
2019-03-02 05:30:00	5.128	1.371	10.834	4.272	7.619	3.116
2019-03-02 06:00:00	6.026	2.074	10.883	4.454	7.544	2.45
2019-03-02 06:30:00	5.179	1.561	10.541	4.141	7.343	2.61
2019-03-02 07:00:00	5.282	1.48	10.173	4.22	7.368	2.423
2019-03-02 07:30:00	4.402	1.099	10.001	3.722	6.889	2.45
2019-03-02 08:00:00	5.36	1.588	9.706	3.854	8.07	7.87
2019-03-02 08:30:00	9.262	5.076	9.78	4.818	9.657	14.577
2019-03-02 09:00:00	12.098	9.139	9.952	6.788	11.54	20.15
2019-03-02 09:30:00	13.449	12.606	10.198	8.22	13.305	22.274
2019-03-02 10:00:00	10.98	11.224	10.516	9.903	14.457	22.657
2019-03-02 10:30:00	12.727	14.002	10.687	11.029	15.39	23.569
2019-03-02 11:00:00	12.074	16.034	11.175	12.413	17.51	28.221
2019-03-02 11:30:00	14.697	19.793	11.321	11.734	18.176	31.382
2019-03-02 12:00:00	13.257	19.103	11.977	12.606	19.96	35.636
2019-03-02 12:30:00	14.84	18.818	12.437	13.69	21.533	36.471
2019-03-02 13:00:00	15.605	16.487	13.016	15.008	21.819	33.521
2019-03-02 13:30:00	16.01	16.773	13.81	16.677	22.489	31.714
2019-03-02 14:00:00	16.844	19.579	14.649	23.737	22.226	29.19
2019-03-02 14:30:00	17.748	21.843	14.888	22.609	22.657	28.866
2019-03-02 15:00:00	18.176	23.064	15.031	22.896	21.843	27.382
2019-03-02 15:30:00	18.081	21.127	15.366	21.079	21.533	26.671
2019-03-02 16:00:00	18.271	21.199	15.247	20.174	21.294	25.695
2019-03-02 16:30:00	18.271	21.509	15.843	21.7	20.174	23.761
2019-03-02 17:00:00	19.484	25.501	16.915	26.989	22.034	24.871
2019-03-02 17:30:00	20.412	27.974	17.938	29.14	21.939	24.653
2019-03-02 18:00:00	19.912	25.793	17.748	27.382	20.007	22.106
2019-03-02 18:30:00	19.841	20.913	17.391	21.008	20.055	22.321
2019-03-02 19:00:00	19.032	19.698	16.939	19.222	19.246	20.841
2019-03-02 19:30:00	18.105	16.892	16.63	16.82	18.081	19.246
2019-03-02 20:00:00	17.177	15.461	16.225	15.438	16.796	17.463
2019-03-02 20:30:00	15.366	14.29	15.605	14.601	15.557	15.796
2019-03-02 21:00:00	15.509	13.233	14.984	13.546	14.96	14.864
2019-03-02 21:30:00	15.031	12.292	14.936	12.461	15.151	13.834
2019-03-02 22:00:00	14.601	11.053	14.505	11.37	14.457	12.437
2019-03-02 22:30:00	14.098	9.854	14.17	10.247	13.834	11.467
2019-03-02 23:00:00	12.92	10.001	13.377	10.394	13.305	11.005
2019-03-02 23:30:00	12.025	8.742	12.847	9.139	13.064	10.1
2019-03-03	11.589	8.866	12.775	9.386	12.389	9.558
2019-03-03 00:30:00	11.005	8.245	12.34	8.742	12.05	9.386
2019-03-03 01:00:00	10.761	7.87	12.34	8.444	12.074	8.593
2019-03-03 01:30:00	10.394	7.519	12.098	8.17	11.904	8.369
2019-03-03 02:00:00	10.247	6.965	12.05	7.745	11.734	8.295
2019-03-03 02:30:00	9.952	6.433	11.759	7.217	11.37	7.82
2019-03-03 03:00:00	9.41	6.23	11.467	6.914	11.005	7.293
2019-03-03 03:30:00	9.139	5.616	11.224	6.331	10.761	6.965
2019-03-03 04:00:00	8.643	5.745	10.883	6.509	10.663	6.763
2019-03-03 04:30:00	8.965	4.714	11.151	5.847	10.32	6.737
2019-03-03 05:00:00	8.841	4.454	11.005	5.847	10.124	6.56
2019-03-03 05:30:00	7.695	5.024	9.903	5.745	9.977	6.458
2019-03-03 06:00:00	7.419	4.766	9.78	5.437	9.706	5.872
2019-03-03 06:30:00	7.318	3.512	9.706	4.298	9.238	5.076
2019-03-03 07:00:00	7.041	2.77	10.075	4.22	8.841	4.844
2019-03-03 07:30:00	5.36	1.751	10.051	3.538	7.97	3.775
2019-03-03 08:00:00	7.066	3.538	9.632	4.584	9.805	9.805
2019-03-03 08:30:00	7.695	6.788	9.583	6.026	11.516	17.177
2019-03-03 09:00:00	8.742	9.163	9.805	7.192	12.896	22.417
2019-03-03 09:30:00	9.188	10.443	9.903	8.469	14.361	25.162
2019-03-03 10:00:00	10.124	11.856	10.198	9.361	15.867	27.949
2019-03-03 10:30:00	11.078	13.449	10.712	10.492	16.82	30.091
2019-03-03 11:00:00	11.904	15.175	10.98	10.956	18.866	33.417
2019-03-03 11:30:00	12.582	15.557	11.662	12.195	19.46	31.919
2019-03-03 12:00:00	13.088	16.225	11.953	12.292	20.15	32.794
2019-03-03 12:30:00	13.642	14.266	12.389	12.896	20.817	32.924
2019-03-03 13:00:00	14.026	13.594	12.751	13.329	19.817	28.32
2019-03-03 13:30:00	14.481	13.954	13.233	14.17	20.317	26.891
2019-03-03 14:00:00	14.984	14.385	13.69	23.088	20.079	25.55
2019-03-03 14:30:00	15.605	15.031	14.385	23.617	19.246	23.761
2019-03-03 15:00:00	16.034	19.08	14.721	22.729	18.461	20.46
2019-03-03 15:30:00	16.225	19.746	15.008	22.944	18.105	19.413
2019-03-03 16:00:00	16.558	20.793	15.461	23.809	17.748	18.747
2019-03-03 16:30:00	16.296	20.341	15.533	22.824	17.177	17.962
2019-03-03 17:00:00	15.748	19.175	15.366	21.461	16.654	17.225
2019-03-03 17:30:00	15.414	19.318	15.079	20.865	16.106	16.511
2019-03-03 18:00:00	14.218	17.415	14.266	18.461	15.676	16.177
2019-03-03 18:30:00	13.642	17.034	13.81	17.843	15.079	15.605
2019-03-03 19:00:00	12.389	11.904	12.823	12.63	14.361	14.481
2019-03-03 19:30:00	11.565	10.394	12.147	10.834	13.642	13.353
2019-03-03 20:00:00	11.102	9.706	11.856	10.173	13.016	12.461
2019-03-03 20:30:00	10.638	9.188	11.565	9.608	12.63	11.807
2019-03-03 21:00:00	10.149	8.668	11.224	9.064	12.171	11.151
2019-03-03 21:30:00	9.854	8.519	11.005	8.916	12.074	10.638
2019-03-03 22:00:00	9.485	8.22	10.443	8.668	10.785	9.756
2019-03-03 22:30:00	9.41	8.12	10.443	8.568	11.102	9.485
2019-03-03 23:00:00	9.361	8.045	10.443	8.519	11.346	9.608
2019-03-03 23:30:00	9.139	8.02	10.198	8.394	10.858	9.558
2019-03-04	8.965	7.67	10.051	8.12	10.81	9.262
2019-03-04 00:30:00	8.742	7.167	9.903	7.72	10.418	8.817
2019-03-04 01:00:00	8.717	7.142	9.903	7.795	10.173	8.742
2019-03-04 01:30:00	8.369	6.813	9.336	7.368	9.509	8.17
2019-03-04 02:00:00	7.945	6.661	8.891	7.217	9.015	7.77
2019-03-04 02:30:00	7.519	5.924	8.519	6.585	8.419	7.015
2019-03-04 03:00:00	7.318	5.821	8.195	6.179	8.369	6.737
2019-03-04 03:30:00	7.015	5.308	8.27	5.796	8.668	6.484
2019-03-04 04:00:00	6.636	5.231	8.095	5.642	8.519	6.255
2019-03-04 04:30:00	6.509	5.796	7.695	6.026	7.695	6
2019-03-04 05:00:00	6.408	5.745	7.469	5.949	7.519	5.898
2019-03-04 05:30:00	6.433	6	7.469	6.102	7.469	5.924
2019-03-04 06:00:00	6.23	5.693	7.444	5.847	8.494	6.306
2019-03-04 06:30:00	6.306	5.796	7.594	6	8.593	6.458
2019-03-04 07:00:00	6.23	5.154	7.72	5.488	8.668	6.255
2019-03-04 07:30:00	6.153	4.921	8.145	5.385	8.643	6.204
2019-03-04 08:00:00	6.535	5.282	8.27	5.975	8.693	6.458
2019-03-04 08:30:00	6.408	5.821	8.02	6.306	9.064	6.889
2019-03-04 09:00:00	6.408	6	7.895	6.382	9.336	7.569
2019-03-04 09:30:00	6.382	6.56	7.77	6.509	9.928	9.213
2019-03-04 10:00:00	6.965	8.02	8.02	7.72	11.929	15.199
2019-03-04 10:30:00	7.066	8.045	7.87	7.97	11.783	13.978
2019-03-04 11:00:00	7.945	11.394	8.543	9.583	15.724	22.729
2019-03-04 11:30:00	8.717	10.883	8.369	9.435	13.064	17.772
2019-03-04 12:00:00	8.568	11.297	8.668	9.114	14.84	21.843
2019-03-04 12:30:00	8.965	10.296	8.941	10.026	14.888	19.294
2019-03-04 13:00:00	9.41	9.756	9.361	10.051	15.867	21.772
2019-03-04 13:30:00	9.485	9.903	9.361	10.761	14.936	18.485
2019-03-04 14:00:00	9.731	10.247	9.558	13.112	14.194	16.796
2019-03-04 14:30:00	10.051	11.54	9.756	13.666	14.505	16.511
2019-03-04 15:00:00	10.785	13.57	10.296	15.7	14.314	15.247
2019-03-04 15:30:00	11.029	14.697	10.59	17.605	13.594	13.93
2019-03-04 16:00:00	11.516	15.055	11.078	17.249	13.04	13.161
2019-03-04 16:30:00	11.37	14.481	11.2	16.725	12.582	12.534
2019-03-04 17:00:00	11.904	15.103	11.929	17.296	12.582	12.461
2019-03-04 17:30:00	11.662	14.721	11.856	16.463	12.195	12.05
2019-03-04 18:00:00	10.712	12.437	11.029	13.088	11.321	11.224
2019-03-04 18:30:00	9.632	9.163	10.075	9.558	10.883	10.59
2019-03-04 19:00:00	8.916	8.568	9.534	8.891	10.443	10.001
2019-03-04 19:30:00	8.693	10.051	9.435	9.706	10.075	9.312
2019-03-04 20:00:00	8.295	7.444	9.139	7.87	9.879	8.742
2019-03-04 20:30:00	7.745	6.763	8.618	7.142	9.114	7.995
2019-03-04 21:00:00	7.318	6.433	8.295	6.661	8.494	7.293
2019-03-04 21:30:00	7.041	6.026	8.17	6.306	8.295	6.763
2019-03-04 22:00:00	6.56	5.334	7.72	5.668	7.82	6.077
2019-03-04 22:30:00	6.306	4.973	7.569	5.385	7.519	5.616
2019-03-04 23:00:00	6.051	4.141	7.569	4.688	7.77	5.128
2019-03-04 23:30:00	5.847	3.932	7.619	4.506	7.72	4.688
2019-03-05	5.796	4.766	7.368	5.154	7.116	4.869
2019-03-05 00:30:00	5.693	4.61	7.293	5.154	7.217	4.895
2019-03-05 01:00:00	5.591	4.35	7.217	4.869	6.99	4.48
2019-03-05 01:30:00	5.539	4.35	7.217	4.766	6.94	4.298
2019-03-05 02:00:00	5.539	4.48	7.142	4.973	7.041	4.714
2019-03-05 02:30:00	5.565	4.688	7.167	5.128	6.965	4.766
2019-03-05 03:00:00	5.514	4.584	7.142	4.947	6.889	4.688
2019-03-05 03:30:00	5.488	4.324	7.192	4.818	6.94	4.402
2019-03-05 04:00:00	5.77	5.334	6.839	5.565	6.636	5.024
2019-03-05 04:30:00	5.642	5.179	6.737	5.437	6.687	5.231
2019-03-05 05:00:00	5.411	4.766	6.661	4.947	7.318	5.154
2019-03-05 05:30:00	5.334	4.089	6.99	4.558	7.242	4.947
2019-03-05 06:00:00	5.076	3.775	7.268	4.272	7.091	4.921
2019-03-05 06:30:00	5.179	4.22	6.712	4.61	6.813	4.74
2019-03-05 07:00:00	5.539	5.334	6.661	5.539	6.94	5.334
2019-03-05 07:30:00	5.488	5.128	6.585	5.308	6.889	5.385
2019-03-05 08:00:00	5.488	5.05	6.687	5.308	7.419	5.411
2019-03-05 08:30:00	5.488	5.102	6.889	5.462	7.419	5.488
2019-03-05 09:00:00	5.591	6.026	7.116	6.357	8.045	6.509
2019-03-05 09:30:00	5.898	7.268	7.268	7.87	8.717	7.77
2019-03-05 10:00:00	6.636	8.095	7.619	8.394	9.386	9.064
2019-03-05 10:30:00	7.318	9.139	7.995	9.213	10.736	11.029
2019-03-05 11:00:00	7.97	9.756	8.369	9.706	11.516	12.34
2019-03-05 11:30:00	8.295	9.682	8.568	9.509	11.516	12.654
2019-03-05 12:00:00	9.238	14.984	9.188	10.883	15.748	24.339
2019-03-05 12:30:00	10.394	13.786	10.051	12.92	17.32	25.525
2019-03-05 13:00:00	11.686	13.93	10.736	13.666	17.891	24.992
2019-03-05 13:30:00	12.147	14.266	11.151	14.481	18.033	23.232
2019-03-05 14:00:00	13.04	14.984	11.807	22.657	18.319	23.737
2019-03-05 14:30:00	13.714	15.963	12.243	24.484	17.177	22.154
2019-03-05 15:00:00	14.649	20.317	13.016	24.098	17.13	19.46
2019-03-05 15:30:00	15.27	20.198	13.714	22.848	17.225	19.365
2019-03-05 16:00:00	15.557	19.46	14.314	22.106	16.725	18.057
2019-03-05 16:30:00	15.652	19.555	14.505	21.7	16.844	18.105
2019-03-05 17:00:00	15.151	18.58	14.337	20.436	15.891	17.13
2019-03-05 17:30:00	14.936	18.343	14.409	19.579	15.008	15.915
2019-03-05 18:00:00	14.433	17.605	13.858	18.509	14.505	15.151
2019-03-05 18:30:00	13.305	13.666	12.968	14.05	13.377	13.762
2019-03-05 19:00:00	13.233	14.242	13.161	15.175	13.281	13.546
2019-03-05 19:30:00	12.823	12.316	12.703	13.329	12.92	13.064
2019-03-05 20:00:00	12.34	11.175	12.292	11.856	12.558	12.437
2019-03-05 20:30:00	11.904	9.928	12.074	10.736	11.419	11.321
2019-03-05 21:00:00	11.54	9.163	11.759	9.952	11.102	10.565
2019-03-05 21:30:00	11.151	8.618	11.297	9.262	10.541	9.558
2019-03-05 22:00:00	10.858	7.67	11.565	8.767	10.59	8.792
2019-03-05 22:30:00	10.663	7.87	11.151	8.717	10.075	8.319
2019-03-05 23:00:00	9.386	7.192	10.932	8.27	9.509	8.27
2019-03-05 23:30:00	9.657	7.066	10.443	7.995	9.163	7.945
2019-03-06	9.312	7.293	10.051	8.07	8.866	7.72
2019-03-06 00:30:00	9.04	7.519	9.854	8.22	8.866	7.92
2019-03-06 01:00:00	8.916	7.419	9.731	8.095	8.99	7.945
2019-03-06 01:30:00	8.767	7.293	9.756	7.945	9.015	7.995
2019-03-06 02:00:00	9.015	8.319	9.706	8.618	9.015	8.07
2019-03-06 02:30:00	8.841	8.12	9.46	8.369	8.742	7.845
2019-03-06 03:00:00	8.668	8.145	9.238	8.319	8.668	7.77
2019-03-06 03:30:00	8.543	8.07	9.064	8.22	8.568	7.77
2019-03-06 04:00:00	8.767	8.419	9.238	8.568	8.643	7.845
2019-03-06 04:30:00	8.817	8.494	9.287	8.618	8.717	7.92
2019-03-06 05:00:00	8.792	8.394	9.287	8.568	8.668	7.82
2019-03-06 05:30:00	8.668	8.344	9.213	8.419	8.618	7.67
2019-03-06 06:00:00	9.089	8.767	9.558	8.965	8.965	8.22
2019-03-06 06:30:00	8.965	8.618	9.41	8.742	8.767	8.245
2019-03-06 07:00:00	9.163	9.04	9.558	9.163	9.015	8.444
2019-03-06 07:30:00	9.756	9.78	10.001	9.829	9.386	8.817
2019-03-06 08:00:00	9.829	9.756	10.075	9.854	9.534	9.089
2019-03-06 08:30:00	10.443	11.029	10.516	10.638	11.321	13.209
2019-03-06 09:00:00	11.37	12.727	11.2	12.001	12.992	16.415
2019-03-06 09:30:00	12.292	14.17	11.88	13.137	15.055	20.46
2019-03-06 10:00:00	12.871	14.936	12.05	13.497	15.605	21.413
2019-03-06 10:30:00	13.329	14.577	12.292	13.906	16.296	21.103
2019-03-06 11:00:00	13.69	14.984	12.485	14.433	15.819	19.318
2019-03-06 11:30:00	14.17	15.581	13.161	14.697	16.82	20.269
2019-03-06 12:00:00	14.84	16.844	13.738	15.629	18.794	23.809
2019-03-06 12:30:00	15.151	16.368	13.978	15.891	18.628	22.92
2019-03-06 13:00:00	16.058	17.796	14.792	17.582	20.555	25.671
2019-03-06 13:30:00	16.511	17.724	15.223	17.867	20.722	24.847
2019-03-06 14:00:00	16.249	17.13	15.103	21.127	20.007	23.521
2019-03-06 14:30:00	16.415	16.987	15.366	21.533	19.246	21.676
2019-03-06 15:00:00	16.439	19.127	15.438	21.509	19.294	20.865
2019-03-06 15:30:00	15.748	17.082	14.96	17.701	17.891	19.603
2019-03-06 16:00:00	15.151	13.522	14.409	13.81	16.701	17.653
2019-03-06 16:30:00	14.601	16.344	14.002	16.939	16.129	15.724
2019-03-06 17:00:00	13.281	12.001	12.775	11.565	14.385	14.266
2019-03-06 17:30:00	13.257	15.27	12.823	15.27	14.553	14.05
2019-03-06 18:00:00	12.944	12.195	12.654	12.364	14.361	14.314
2019-03-06 18:30:00	11.856	10.173	11.565	10.1	12.775	11.929
2019-03-06 19:00:00	11.467	10.1	11.346	10.075	12.147	11.321
2019-03-06 19:30:00	11.175	10.026	11.005	10.001	11.88	10.98
2019-03-06 20:00:00	10.932	9.977	10.932	10.026	11.248	10.59
2019-03-06 20:30:00	10.81	9.854	10.932	9.928	11.078	10.369
2019-03-06 21:00:00	10.907	10.247	11.029	10.075	11.127	10.345
2019-03-06 21:30:00	10.883	10.443	11.078	10.051	11.005	9.928
2019-03-06 22:00:00	10.858	10.026	11.005	9.952	11.2	10.001
2019-03-06 22:30:00	10.418	9.805	10.638	9.41	10.956	9.509
2019-03-06 23:00:00	9.854	9.015	10.222	8.668	10.1	8.045
2019-03-06 23:30:00	9.312	8.568	9.608	8.17	9.435	7.116
2019-03-07	9.756	9.435	9.854	9.213	9.336	7.293
2019-03-07 00:30:00	9.731	9.114	9.928	9.064	9.312	7.268
2019-03-07 01:00:00	9.41	8.767	9.805	8.668	9.114	7.192
2019-03-07 01:30:00	9.41	9.015	9.682	8.916	9.064	7.368
2019-03-07 02:00:00	9.163	8.568	9.583	8.618	9.089	7.494
2019-03-07 02:30:00	8.891	8.469	9.435	8.568	9.287	7.92
2019-03-07 03:00:00	8.469	7.72	9.139	7.795	9.287	7.77
2019-03-07 03:30:00	8.22	7.619	8.916	7.695	9.089	7.619
2019-03-07 04:00:00	7.92	7.419	8.593	7.494	8.742	7.645
2019-03-07 04:30:00	7.695	7.015	8.419	7.142	8.469	7.217
2019-03-07 05:00:00	7.368	6.712	7.97	6.763	7.72	6.636
2019-03-07 05:30:00	7.015	6.306	7.645	6.357	7.343	6.128
2019-03-07 06:00:00	6.712	5.847	7.494	5.949	7.167	5.642
2019-03-07 06:30:00	6.636	5.975	7.469	6.077	7.167	5.642
2019-03-07 07:00:00	6.737	6.382	7.72	6.611	7.845	6.23
2019-03-07 07:30:00	6.813	6.535	7.745	6.687	7.745	6.281
2019-03-07 08:00:00	6.56	6.102	7.368	6.179	7.695	6.99
2019-03-07 08:30:00	6.914	7.72	7.67	7.393	9.805	11.953
2019-03-07 09:00:00	7.469	8.07	7.87	7.393	10.883	15.772
2019-03-07 09:30:00	7.92	8.717	7.995	7.619	11.759	17.962
2019-03-07 10:00:00	8.668	9.583	8.419	8.593	12.389	17.938
2019-03-07 10:30:00	8.941	9.41	8.519	9.213	12.147	15.7
2019-03-07 11:00:00	9.312	10.516	8.866	10.149	13.064	16.487
2019-03-07 11:30:00	9.558	10.1	8.99	10.001	12.775	15.247
2019-03-07 12:00:00	9.854	11.127	9.238	10.712	13.834	17.272
2019-03-07 12:30:00	10.687	11.565	10.001	11.273	15.629	22.226
2019-03-07 13:00:00	11.224	12.34	10.443	12.292	16.749	22.417
2019-03-07 13:30:00	11.443	12.025	10.638	12.461	15.939	20.388
2019-03-07 14:00:00	11.71	11.734	10.834	18.057	15.676	19.508
2019-03-07 14:30:00	12.703	13.257	11.613	20.484	15.485	18.699
2019-03-07 15:00:00	13.257	17.534	11.953	21.223	15.366	16.939
2019-03-07 15:30:00	13.04	15.796	11.953	17.938	15.055	16.487
2019-03-07 16:00:00	13.978	19.603	12.847	22.585	15.175	16.106
2019-03-07 16:30:00	14.314	18.033	13.233	20.579	14.625	15.175
2019-03-07 17:00:00	14.457	19.508	13.594	21.772	14.17	14.505
2019-03-07 17:30:00	14.29	18.842	13.618	20.603	13.714	14.002
2019-03-07 18:00:00	14.577	18.985	13.882	20.65	13.425	13.594
2019-03-07 18:30:00	14.242	17.558	13.81	18.842	12.944	13.04
2019-03-07 19:00:00	13.882	16.773	13.449	17.534	12.389	12.389
2019-03-07 19:30:00	13.257	15.055	13.016	15.461	11.589	11.516
2019-03-07 20:00:00	12.389	11.102	12.437	12.098	11.175	10.565
2019-03-07 20:30:00	11.321	9.064	11.904	9.509	10.638	9.558
2019-03-07 21:00:00	10.712	7.97	11.783	8.494	10.345	8.469
2019-03-07 21:30:00	10.1	7.594	11.516	8.145	10.173	8.22
2019-03-07 22:00:00	9.435	6.965	10.785	7.393	9.829	7.895
2019-03-07 22:30:00	9.312	6.306	11.005	7.015	9.46	6.94
2019-03-07 23:00:00	8.543	6	9.657	6.763	8.444	6.99
2019-03-07 23:30:00	8.593	5.565	9.952	6.306	8.668	6.357
2019-03-08	8.27	4.037	10.149	5.257	8.12	5.257
2019-03-08 00:30:00	7.645	3.195	10.443	4.895	7.469	4.011
2019-03-08 01:00:00	4.792	1.94	10.173	4.063	6.331	3.036
2019-03-08 01:30:00	4.089	1.48	9.731	3.643	5.898	2.744
2019-03-08 02:00:00	2.343	0.687	9.558	3.089	5.231	1.994
2019-03-08 02:30:00	2.236	0.051	9.163	2.877	5.231	1.153
2019-03-08 03:00:00	1.832	-0.171	8.618	2.45	4.895	1.208
2019-03-08 03:30:00	1.778	-0.902	8.195	2.128	4.999	0.467
2019-03-08 04:00:00	0.273	-1.498	7.845	1.453	4.089	-0.06
2019-03-08 04:30:00	0.825	-1.327	7.67	1.453	4.115	0.246
2019-03-08 05:00:00	0.687	-1.871	7.368	0.989	3.775	-0.116
2019-03-08 05:30:00	0.163	-2.015	7.142	0.742	3.696	-0.507
2019-03-08 06:00:00	-0.116	-2.45	7.015	0.687	3.512	-1.015
2019-03-08 06:30:00	-0.367	-2.625	6.56	0.329	3.459	-1.128
2019-03-08 07:00:00	-0.535	-2.83	6.306	0.163	3.195	-1.299
2019-03-08 07:30:00	0.19	-1.785	6.153	0.522	3.67	-0.339
2019-03-08 08:00:00	1.751	-0.873	6.077	1.044	4.428	3.327
2019-03-08 08:30:00	5.539	1.805	6.204	2.316	6.408	10.369
2019-03-08 09:00:00	7.242	5.488	6.687	4.35	8.394	13.57
2019-03-08 09:30:00	8.693	7.97	6.813	5.488	9.854	15.557
2019-03-08 10:00:00	9.312	9.064	6.965	6.153	10.736	15.509
2019-03-08 10:30:00	10.443	11.127	7.419	6.889	11.516	17.32
2019-03-08 11:00:00	11.467	13.738	7.72	7.393	12.122	19.46
2019-03-08 11:30:00	12.292	15.557	8.12	8.12	14.074	20.412
2019-03-08 12:00:00	12.63	17.534	8.519	8.717	14.792	21.509
2019-03-08 12:30:00	13.329	13.786	9.015	9.657	15.819	21.223
2019-03-08 13:00:00	13.738	12.896	9.386	10.247	15.557	20.507
2019-03-08 13:30:00	13.618	13.137	9.928	12.001	15.605	18.842
2019-03-08 14:00:00	13.594	13.305	10.81	30.495	14.936	18.319
2019-03-08 14:30:00	13.738	14.697	11.613	36.579	14.697	17.701
2019-03-08 15:00:00	14.002	25.21	12.413	35.208	14.385	15.748
2019-03-08 15:30:00	14.026	28.518	13.112	38.924	14.529	15.318
2019-03-08 16:00:00	14.361	28.369	13.858	37.645	14.505	15.223
2019-03-08 16:30:00	14.601	28.866	14.266	36.065	14.433	15.127
2019-03-08 17:00:00	14.721	28.617	14.816	36.688	14.481	15.175
2019-03-08 17:30:00	14.625	28.27	14.936	36.498	14.361	14.984
2019-03-08 18:00:00	14.505	27.53	15.39	34.545	14.098	14.745
2019-03-08 18:30:00	14.409	26.989	15.7	33.287	13.834	14.457
2019-03-08 19:00:00	14.266	25.113	15.939	31.357	13.546	14.146
2019-03-08 19:30:00	13.954	22.465	15.891	28.023	13.016	13.546
2019-03-08 20:00:00	13.257	16.415	15.629	22.178	12.316	12.389
2019-03-08 20:30:00	12.268	13.377	15.294	17.415	11.54	10.956
2019-03-08 21:00:00	10.687	11.613	15.318	14.721	10.81	9.558
2019-03-08 21:30:00	9.583	10.026	15.031	13.016	10.149	8.519
2019-03-08 22:00:00	10.541	10.173	14.888	13.281	10.051	9.015
2019-03-08 22:30:00	9.558	8.817	14.553	11.613	9.805	8.17
2019-03-08 23:00:00	8.618	7.87	14.553	10.712	9.312	7.419
2019-03-08 23:30:00	7.619	6.864	14.146	9.632	8.841	6.737
2019-03-09	7.318	6.255	13.762	8.866	8.519	6.357
2019-03-09 00:30:00	6.712	5.616	13.449	8.344	8.17	5.796
2019-03-09 01:00:00	7.066	5.462	13.401	8.245	8.295	5.924
2019-03-09 01:30:00	7.217	5.437	13.185	8.27	8.319	6.026
2019-03-09 02:00:00	7.091	5.154	12.944	7.87	8.195	5.745
2019-03-09 02:30:00	6.864	4.818	12.775	7.544	8.045	5.591
2019-03-09 03:00:00	7.72	5.924	11.953	8.145	7.87	6.382
2019-03-09 03:30:00	6	3.854	12.025	6.357	7.217	4.714
2019-03-09 04:00:00	5.282	3.406	11.734	5.796	7.015	4.402
2019-03-09 04:30:00	4.662	2.396	11.273	5.154	6.102	3.327
2019-03-09 05:00:00	4.402	2.343	11.102	4.869	6.331	3.38
2019-03-09 05:30:00	4.246	2.101	10.736	4.506	6.306	3.248
2019-03-09 06:00:00	3.354	1.235	10.222	3.932	5.616	2.289
2019-03-09 06:30:00	3.142	1.317	9.879	3.512	5.616	2.396
2019-03-09 07:00:00	2.503	0.715	9.558	3.116	5.231	1.724
2019-03-09 07:30:00	2.557	0.989	9.336	3.221	5.179	1.967
2019-03-09 08:00:00	3.433	1.967	9.114	3.932	5.821	4.766
2019-03-09 08:30:00	7.695	5.076	9.238	5.514	7.82	10.932
2019-03-09 09:00:00	10.443	7.92	9.386	6.687	9.064	14.768
2019-03-09 09:30:00	12.243	10.418	9.657	8.02	10.418	17.463
2019-03-09 10:00:00	13.401	12.775	9.928	9.262	12.122	19.912
2019-03-09 10:30:00	14.266	14.625	10.345	10.222	14.074	20.841
2019-03-09 11:00:00	14.84	16.844	10.59	10.883	15.485	22.274
2019-03-09 11:30:00	15.748	18.557	11.078	11.807	16.463	22.872
2019-03-09 12:00:00	16.32	20.984	11.321	12.509	17.368	24.581
2019-03-09 12:30:00	16.725	16.582	11.929	13.522	17.201	23.569
2019-03-09 13:00:00	16.868	16.01	12.292	14.553	17.249	21.557
2019-03-09 13:30:00	16.749	16.344	12.678	15.557	17.344	21.27
2019-03-09 14:00:00	16.558	16.749	13.449	31.103	16.939	20.031
2019-03-09 14:30:00	16.677	17.891	14.218	34.572	16.534	19.127
2019-03-09 15:00:00	16.987	27.85	14.768	37.535	16.677	18.152
2019-03-09 15:30:00	17.106	28.196	15.342	36.552	16.606	17.748
2019-03-09 16:00:00	17.249	30.091	16.082	39.403	16.725	17.724
2019-03-09 16:30:00	17.439	29.966	16.463	37.949	16.677	17.724
2019-03-09 17:00:00	17.486	29.515	17.106	36.444	16.582	17.653
2019-03-09 17:30:00	17.486	29.515	17.582	36.606	16.582	17.558
2019-03-09 18:00:00	17.463	28.32	17.772	34.413	16.415	17.415
2019-03-09 18:30:00	17.32	28.048	17.986	33.417	16.272	17.177
2019-03-09 19:00:00	16.987	26.207	18.01	31.077	15.676	16.63
2019-03-09 19:30:00	16.439	23.064	17.891	27.087	15.079	15.915
2019-03-09 20:00:00	15.676	17.486	17.534	21.891	14.17	14.601
2019-03-09 20:30:00	15.031	15.031	17.344	18.675	13.257	13.473
2019-03-09 21:00:00	14.026	13.57	17.13	16.606	12.896	12.389
2019-03-09 21:30:00	12.847	12.34	16.868	14.745	12.389	11.54
2019-03-09 22:00:00	11.783	11.102	16.82	13.594	11.783	10.418
2019-03-09 22:30:00	10.736	10.075	16.463	12.654	11.2	9.558
2019-03-09 23:00:00	9.731	8.817	16.106	11.516	10.394	8.568
2019-03-09 23:30:00	8.99	8.195	15.819	11.2	10.051	8.045
2019-03-10	8.965	7.97	15.557	10.736	9.977	8.095
2019-03-10 00:30:00	8.17	6.965	15.151	9.854	9.312	7.318
2019-03-10 01:00:00	7.77	6.636	14.888	9.509	9.114	7.066
2019-03-10 01:30:00	7.82	6.433	14.697	9.312	9.114	7.192
2019-03-10 02:00:00	8.17	6.458	14.385	9.262	9.336	7.142
2019-03-10 02:30:00	7.393	5.719	14.026	8.469	8.618	6.56
2019-03-10 03:00:00	7.469	5.668	13.666	8.295	8.817	6.484
2019-03-10 03:30:00	7.519	5.411	13.546	8.319	8.693	6.408
2019-03-10 04:00:00	6.889	4.869	13.257	7.695	8.17	5.872
2019-03-10 04:30:00	6.23	4.532	12.727	7.066	7.795	5.514
2019-03-10 05:00:00	5.77	4.037	12.558	6.712	7.519	5.128
2019-03-10 05:30:00	5.949	3.985	12.413	6.382	7.419	5.024
2019-03-10 06:00:00	6.636	4.636	12.292	6.965	8.045	5.821
2019-03-10 06:30:00	6.458	4.376	12.147	6.839	7.77	5.462
2019-03-10 07:00:00	7.368	5.847	11.977	7.97	8.195	6.153
2019-03-10 07:30:00	7.92	6.585	11.856	8.593	8.469	6.914
2019-03-10 08:00:00	8.195	6.509	11.759	8.319	8.99	9.41
2019-03-10 08:30:00	10.1	8.99	11.565	9.213	10.761	14.074
2019-03-10 09:00:00	12.316	11.151	11.759	9.977	12.195	17.082
2019-03-10 09:30:00	13.449	12.727	11.832	10.614	13.546	18.866
2019-03-10 10:00:00	14.481	14.433	12.001	11.443	14.529	20.293
2019-03-10 10:30:00	15.557	16.439	12.219	11.783	14.984	22.585
2019-03-10 11:00:00	16.439	18.295	12.389	12.195	15.724	24.339
2019-03-10 11:30:00	17.082	20.674	12.727	13.016	17.177	26.94
2019-03-10 12:00:00	18.033	23.16	13.088	14.05	18.961	28.369
2019-03-10 12:30:00	18.652	18.628	13.546	14.888	19.056	27.875
2019-03-10 13:00:00	19.175	18.2	14.074	16.082	19.841	26.231
2019-03-10 13:30:00	18.985	18.39	14.553	17.177	19.674	24.122
2019-03-10 14:00:00	19.08	19.318	15.461	33.261	19.341	22.489
2019-03-10 14:30:00	19.318	20.817	16.487	37.096	19.222	21.819
2019-03-10 15:00:00	19.936	31.179	16.82	36.525	19.508	21.294
2019-03-10 15:30:00	20.198	32.175	17.653	36.444	19.508	20.96
2019-03-10 16:00:00	19.936	33.992	18.533	41.414	19.436	20.746
2019-03-10 16:30:00	20.174	34.36	18.937	41.181	19.579	20.674
2019-03-10 17:00:00	19.912	34.071	19.746	42.06	19.222	20.365
2019-03-10 17:30:00	19.984	34.281	19.674	41.825	19.151	20.269
2019-03-10 18:00:00	20.46	34.124	19.77	38.032	19.08	20.269
2019-03-10 18:30:00	20.222	33.469	20.031	38.032	18.866	19.984
2019-03-10 19:00:00	20.174	30.621	20.174	34.969	18.58	19.651
2019-03-10 19:30:00	19.674	27.776	20.793	32.355	18.033	19.175
2019-03-10 20:00:00	19.222	22.058	20.174	26.207	17.225	18.152
2019-03-10 20:30:00	17.629	19.698	19.841	22.824	16.201	16.606
2019-03-10 21:00:00	17.106	18.033	19.674	20.269	15.7	15.724
2019-03-10 21:30:00	16.177	17.13	19.722	19.555	15.175	15.031
2019-03-10 22:00:00	14.936	15.7	19.651	18.057	14.433	14.122
2019-03-10 22:30:00	14.194	14.745	19.413	17.249	14.002	13.425
2019-03-10 23:00:00	14.505	14.17	19.318	16.82	14.05	13.112
2019-03-10 23:30:00	14.361	13.377	18.985	16.177	13.449	12.485
2019-03-11	15.438	13.906	18.723	16.32	13.906	13.233
2019-03-11 00:30:00	15.414	13.69	18.509	15.963	13.786	13.209
2019-03-11 01:00:00	15.509	13.161	18.2	15.485	13.497	12.847
2019-03-11 01:30:00	15.748	13.618	17.891	15.533	13.594	13.112
2019-03-11 02:00:00	15.7	13.882	17.582	15.605	13.906	13.786
2019-03-11 02:30:00	15.509	13.642	17.605	15.342	13.786	13.618
2019-03-11 03:00:00	15.509	13.642	16.987	14.721	13.377	13.209
2019-03-11 03:30:00	15.438	13.281	16.749	14.385	13.185	12.654
2019-03-11 04:00:00	14.433	11.783	16.892	13.353	12.606	11.71
2019-03-11 04:30:00	12.509	10.565	16.796	12.389	12.05	10.834
2019-03-11 05:00:00	12.05	9.977	16.534	11.807	11.686	10.247
2019-03-11 05:30:00	11.005	8.891	15.891	10.883	11.078	9.238
2019-03-11 06:00:00	10.565	8.344	15.676	10.345	10.834	8.841
2019-03-11 06:30:00	10.001	7.97	15.461	10.051	10.638	8.543
2019-03-11 07:00:00	9.312	7.795	15.175	9.632	10.247	8.469
2019-03-11 07:30:00	9.608	7.945	15.103	9.928	10.614	8.519
2019-03-11 08:00:00	10.149	8.319	14.864	10.1	10.858	10.614
2019-03-11 08:30:00	14.146	11.175	14.84	11.273	12.92	16.844
2019-03-11 09:00:00	16.272	14.17	14.936	12.775	14.457	20.698
2019-03-11 09:30:00	17.677	16.558	15.175	13.69	16.01	24.46
2019-03-11 10:00:00	19.175	18.533	15.247	14.337	16.939	27.259
2019-03-11 10:30:00	20.436	20.936	15.39	14.984	18.39	30.167
2019-03-11 11:00:00	21.533	24.146	15.581	15.748	19.532	32.846
2019-03-11 11:30:00	20.793	25.04	16.082	16.844	21.915	34.81
2019-03-11 12:00:00	22.226	30.394	15.939	17.106	22.058	37.811
2019-03-11 12:30:00	22.633	23.617	16.272	17.986	23.256	38.198
2019-03-11 13:00:00	24.653	22.944	16.868	19.698	23.521	34.624
2019-03-11 13:30:00	21.939	21.891	17.677	20.603	24.557	34.308
2019-03-11 14:00:00	22.058	22.202	18.533	33.626	24.629	32.665
2019-03-11 14:30:00	22.872	24.532	19.056	41.736	23.545	30.722
2019-03-11 15:00:00	23.857	32.691	19.627	38.784	24.195	28.122
2019-03-11 15:30:00	24.219	39.29	19.984	46.29	23.521	26.744
2019-03-11 16:00:00	25.307	33.131	21.557	37.288	23.833	26.353
2019-03-11 16:30:00	25.355	39.743	21.581	44.319	23.28	25.647
2019-03-11 17:00:00	26.28	34.995	22.753	38.449	23.376	25.38
2019-03-11 17:30:00	26.402	33.027	23.088	35.582	22.848	24.847
2019-03-11 18:00:00	26.402	34.15	23.232	36.281	22.609	24.412
2019-03-11 18:30:00	26.304	33.678	23.448	35.022	22.082	23.785
2019-03-11 19:00:00	26.329	31.74	23.304	33.704	21.485	23.16
2019-03-11 19:30:00	25.866	28.642	23.016	29.64	20.817	22.274
2019-03-11 20:00:00	25.065	23.497	22.513	24.098	19.888	21.032
2019-03-11 20:30:00	24.339	21.413	22.609	21.987	19.674	20.627
2019-03-11 21:00:00	23.545	20.388	22.298	20.936	19.103	19.698
2019-03-11 21:30:00	21.676	19.96	22.154	20.96	18.889	19.389
2019-03-11 22:00:00	22.393	18.485	21.509	19.318	17.796	17.796
2019-03-11 22:30:00	21.748	17.962	21.27	18.771	17.486	17.272
2019-03-11 23:00:00	21.557	17.058	21.27	18.224	17.011	16.106
2019-03-11 23:30:00	20.603	16.415	20.46	17.272	16.558	15.891
2019-03-12	20.627	15.986	20.984	17.51	16.415	15.318
2019-03-12 00:30:00	19.96	15.223	20.507	16.558	15.867	14.673
2019-03-12 01:00:00	19.365	14.673	19.936	15.915	15.438	13.978
2019-03-12 01:30:00	19.08	13.69	19.841	15.247	15.199	13.329
2019-03-12 02:00:00	15.939	12.63	20.007	14.745	14.218	12.534
2019-03-12 02:30:00	14.194	11.734	19.793	14.05	13.618	11.637
2019-03-12 03:00:00	14.074	11.127	19.318	13.497	13.377	10.98
2019-03-12 03:30:00	16.177	11.565	18.557	13.137	13.353	10.638
2019-03-12 04:00:00	16.225	11.321	18.604	13.112	13.353	10.59
2019-03-12 04:30:00	14.529	10.1	18.747	12.678	13.04	10.369
2019-03-12 05:00:00	12.461	8.99	18.176	11.856	12.098	9.46
2019-03-12 05:30:00	12.05	8.593	17.915	11.516	11.832	8.941
2019-03-12 06:00:00	10.418	7.97	17.772	10.956	11.224	8.295
2019-03-12 06:30:00	10.198	7.569	17.344	10.638	11.078	7.995
2019-03-12 07:00:00	9.756	6.94	17.106	10.296	10.932	7.745
2019-03-12 07:30:00	9.188	6.585	16.272	9.756	10.687	7.368
2019-03-12 08:00:00	9.163	6.687	15.867	9.632	10.785	9.485
2019-03-12 08:30:00	12.461	8.866	15.652	10.394	12.389	16.511
2019-03-12 09:00:00	15.7	12.968	15.986	11.686	14.218	22.848
2019-03-12 09:30:00	16.01	15.247	16.296	13.185	16.082	26.818
2019-03-12 10:00:00	15.676	16.844	16.177	14.314	18.271	31.51
2019-03-12 10:30:00	22.274	21.199	16.344	15.557	18.366	31.586
2019-03-12 11:00:00	23.328	23.617	16.606	16.582	19.08	32.691
2019-03-12 11:30:00	24.098	27.235	16.701	17.296	21.175	35.049
2019-03-12 12:00:00	25.258	30.167	16.939	18.2	21.294	36.281
2019-03-12 12:30:00	25.793	24.074	17.32	19.484	22.25	36.281
2019-03-12 13:00:00	25.939	23.569	17.724	20.627	23.112	33.443
2019-03-12 13:30:00	25.283	23.593	18.176	22.298	22.513	31.459
2019-03-12 14:00:00	23.641	22.753	19.175	34.81	24.267	31.255
2019-03-12 14:30:00	24.098	25.793	20.174	37.508	24.484	30.167
2019-03-12 15:00:00	24.823	34.624	20.603	40.142	24.339	27.998
2019-03-12 15:30:00	25.355	35.102	21.461	40.2	25.162	27.751
2019-03-12 16:00:00	25.477	32.175	21.843	35.689	24.339	26.989
2019-03-12 16:30:00	26.134	30.95	22.8	33.887	25.258	27.899
2019-03-12 17:00:00	25.065	25.987	21.963	25.987	24.388	27.407
2019-03-12 17:30:00	24.774	26.329	21.891	26.598	23.761	26.769
2019-03-12 18:00:00	24.436	25.162	21.748	25.065	23.545	26.353
2019-03-12 18:30:00	24.436	27.505	21.795	27.259	23.28	25.841
2019-03-12 19:00:00	24.388	25.283	21.891	26.475	22.226	24.388
2019-03-12 19:30:00	23.569	21.915	21.413	22.13	20.96	22.561
2019-03-12 20:00:00	22.058	20.793	21.294	21.223	20.198	21.246
2019-03-12 20:30:00	22.034	19.698	20.913	19.793	19.746	20.46
2019-03-12 21:00:00	21.724	19.032	20.984	19.603	19.341	19.722
2019-03-12 21:30:00	19.96	17.938	20.913	18.723	18.533	18.533
2019-03-12 22:00:00	18.961	16.963	20.77	18.152	17.843	17.368
2019-03-12 22:30:00	19.199	16.796	20.269	17.701	17.582	17.177
2019-03-12 23:00:00	19.698	17.391	19.912	18.081	17.724	17.486
2019-03-12 23:30:00	19.222	16.701	19.936	17.701	17.677	17.463
2019-03-13	19.08	16.249	19.579	17.296	17.344	17.177
2019-03-13 00:30:00	18.509	15.652	19.27	16.844	16.987	16.654
2019-03-13 01:00:00	18.152	15.199	19.08	16.225	16.773	16.225
[truncated: 788 more rows]

## Sheet: Tpref and Tbs
ID	Tpref	Lower set point	Higher set point	Tb
V1	35.92	34.24	36.98	20.7
V2	32.16	29.78	33.89	18.8
V3	31.51	29.65	33.73	23
V4	31.47	28.52	35.3	19
V5	36.69	34.67	38.19	28.7
V6	33.49	32.19	34.5	22.1
V7	37.14	35.47	39.33	28.4
V8	36.98	36.19	37.72	27.8
V9	37.19	35.22	38.19	24.9
V10	36.39	34.85	37.08	27.4
V11	37.32	36.56	38.13	26.6
V12	38.27	37.2	38.86	28.5
V13	37.15	36.74	37.66	16.5
V14	37.15	36.74	37.66	16.5
V15	36.73	35.6	37.5	27.2
V16	NA	NA	NA	25.5
V17	37.5	36.12	38.87	33
V18	37.5	36.12	38.87	33
V19	35.69	34.12	37.17	27.4
V20	35.97	34.43	37.85	29.4
V21	35.75	35.26	37.24	28.6
V22	34.345	33.085	35.16	26.7
V23	33.04	31.805	34.62	26.2
V24	35.51	34.612	36.13	23.7
V25	35.695	35.47	36.34	24.1
V26	31.335	30.32	33.06	19.5
V28	36.485	35.575	37.37	17.9
V29	31.33	30.32	33.06	20.3
V30	36.48	35.575	37.37	24.9
V31	NA	NA	NA	27.7
V32	32.73	31.748	33.843	26.4
V33	NA	NA	NA	26
V34	NA	NA	NA	26.6
V35	35.465	34.695	36.31	23.6
V36	35.645	34.09	36.29	27

## Sheet: To and Vmax
ID	Vmax_SR	To_SR	lowerT80_SR	higherT80_SR	Vmax_LR	To_LR	lowerT80_LR	higherT80_LR
V1	1.47625	33.8215	25.3791	39.4201	1.43988	35.2953	27.6294	40.1123
V2	1.29709	34.9268	28.1618	38.7715	1.41573	36.7734	30.7342	39.7577
V3	1.5915	35.6844	30.3451	38.4511	1.57509	39.9197	35.3801	41.4258
V4	1.88139	36.5387	28.8832	40.6623	1.27893	34.3479	25.9253	39.5386
V5	2.0013	36.1416	28.2125	40.2305	1.34376	34.1425	27.0667	38.5887
V6	1.32744	35.1652	26.7785	39.9751	1.5565	34.5349	28.3434	38.7484
V7	NA	NA	NA	NA	1.38721	33.511	27.7671	37.1096
V8	NA	NA	NA	NA	1.61217	39.2757	33.2742	41.7225
V9	2.26519	30.4481	25.1978	35.1164	1.40757	31.1632	25.6067	36.7197
V10	3.92743	37.5337	37.1121	37.6486	1.61811	35.4164	31.5023	37.7685
V11	1.61369	34.4024	28.8716	38.1387	1.66376	34.5516	29.1983	38.2239
V12	1.92988	23.941	22.2708	27.7993	1.28285	34.6732	28.1813	38.818
V13	2.04702	38.319	35.7788	39.3355	1.30269	35.9845	27.5706	40.8443
V14	1.79875	41.169	36.5318	42.7161	1.38247	37.5447	30.3571	41.1385
V15	1.5232	35.5978	27.4772	39.9191	1.28131	38.6163	27.1192	41.4102
V17	1.51408	39.5903	32.9256	41.7554	1.30217	38.1869	31.0158	41.2712
V18	2.6179	37.0753	35.5399	37.5466	1.34387	36.0911	29.6727	39.2016
V19	3.92573	23.1492	21.9596	25.4468	1.35541	36.4174	28.4866	40.7976
V20	2.91097	24.3491	21.9039	28.1683	1.48142	36.5726	29.5049	39.9025
V21	1.4024	34.4884	28.084	38.5635	1.294	36.2559	30.7548	39.4863
V22	1.93364	40.2868	34.6319	42.0618	1.53003	40.5335	35.9953	42.1033
V23	1.20594	34.6703	26.6646	39.3984	1.03364	34.2186	29.3703	37.4832
V24	1.18706	32.518	23.9643	38.2223	1.29889	35.3667	27.8769	39.6791
V25	1.41887	35.0592	27.3156	39.5708	1.49755	37.9653	31.7057	40.9174
V26	1.5039	36.3352	31.1891	39.0684	1.39466	30.2326	24.8478	35.6173
V28	1.25145	36.6553	29.5455	40.3194	1.56489	36.5852	32.4579	38.6321
V29	1.53298	35.5031	29.6259	39.186	0.999996	34.4773	28.4247	38.5156
V30	2.44334	26.2109	22.7788	30.8718	1.37957	34.6752	29.0971	38.4902
V31	1.72956	35.5283	29.7417	38.9144	NA	37.8092	33.6886	39.8057
V32	NA	NA	NA	NA	1.23648	36.7457	29.6812	40.4139
V33	1.64667	35.183	27.444	39.6523	1.357	35.501	28.6082	39.56
V34	1.45968	27.4673	19.2906	34.8849	1.46062	36.1835	28.8091	40.1536
V35	2.09633	36.3109	30.6384	39.4496	1.53379	37.1524	32.5291	39.5502
V36	3.81095	25.0666	24.9471	25.3186	1.38473	33.8122	27.2294	38.2534
